# Supplementary material for: Genetic variation at RAB3GAP2 and its role in exercise-related adaptation and recovery
Source: Research Square preprint supplement (doi:10.21203/rs.3.rs-701652/v1), 2021-07-16
Supplement: Supplementary file 1 [file b04bc556a91a178fd845d85b.xlsx]

## Sheet: RNAseq
Ensembl Gene ID	Gene Symbol	log2 FC	Fold Change	Padj
ENSG00000125726	CD70	1.53684	2.90159	1.38346e-40
ENSG00000118873	RAB3GAP2	-1.6902	0.309884	1.69671e-26
ENSG00000138028	CGREF1	1.21648	2.32379	2.09139e-26
ENSG00000149557	FEZ1	0.659293	1.57931	6.82383e-16
ENSG00000189067	LITAF	0.840013	1.79007	1.41568e-14
ENSG00000076554	TPD52	1.36339	2.57289	4.37567e-14
ENSG00000240972	MIF	0.467577	1.38279	9.89627e-14
ENSG00000178695	KCTD12	-0.539895	0.687821	1.21858e-12
ENSG00000170571	EMB	2.23277	4.70037	1.77591e-11
ENSG00000149591	TAGLN	0.608681	1.52486	1.933e-11
ENSG00000105048	TNNT1	0.417471	1.33558	3.7225e-11
ENSG00000213626	LBH	0.676104	1.59782	4.91874e-11
ENSG00000133687	TMTC1	-0.526891	0.694049	1.57157e-10
ENSG00000244187	TMEM141	0.512052	1.42608	2.18903e-10
ENSG00000099977	DDT	0.480984	1.3957	2.87806e-10
ENSG00000135454	B4GALNT1	0.947412	1.92841	3.40721e-10
ENSG00000112378	PERP	0.45684	1.37253	3.81085e-10
ENSG00000118432	CNR1	-1.02377	0.491831	3.90588e-10
ENSG00000130005	GAMT	0.413274	1.3317	1.06823e-09
ENSG00000142173	COL6A2	1.13529	2.19663	1.8227e-09
ENSG00000100196	KDELR3	0.441603	1.35811	2.73641e-09
ENSG00000138650	PCDH10	-0.839724	0.55875	8.60093e-09
ENSG00000104518	GSDMD	0.315668	1.24459	2.17105e-08
ENSG00000169100	SLC25A6	0.326857	1.25428	3.39236e-08
ENSG00000077942	FBLN1	0.684979	1.60768	3.79375e-08
ENSG00000154096	THY1	0.814586	1.75879	4.86401e-08
ENSG00000198832	SELENOM	0.529177	1.44311	5.34168e-08
ENSG00000137573	SULF1	-0.493664	0.710219	5.34168e-08
ENSG00000184226	PCDH9	-1.00446	0.498455	5.39682e-08
ENSG00000101210	EEF1A2	0.802445	1.74405	5.41526e-08
ENSG00000163485	ADORA1	1.54408	2.91618	7.39311e-08
ENSG00000170430	MGMT	0.879003	1.8391	7.39311e-08
ENSG00000146250	PRSS35	-1.02612	0.49103	7.39311e-08
ENSG00000133321	PLAAT4	0.73737	1.66713	9.79554e-08
ENSG00000151623	NR3C2	-1.34709	0.393083	1.10154e-07
ENSG00000184983	NDUFA6	0.442393	1.35886	2.88989e-07
ENSG00000100504	PYGL	0.396004	1.31586	2.88989e-07
ENSG00000115461	IGFBP5	-0.628881	0.646678	4.62094e-07
ENSG00000118689	FOXO3	-0.336499	0.791961	4.78742e-07
ENSG00000144724	PTPRG	-1.05813	0.480253	4.78742e-07
ENSG00000151952	TMEM132D	-1.19081	0.438058	4.78742e-07
ENSG00000125657	TNFSF9	0.834852	1.78367	5.46863e-07
ENSG00000051523	CYBA	0.347719	1.27255	6.65743e-07
ENSG00000104067	TJP1	-0.50121	0.706514	7.47208e-07
ENSG00000116857	TMEM9	0.370627	1.29291	8.35242e-07
ENSG00000113621	TXNDC15	0.442979	1.35941	1.0773e-06
ENSG00000137726	FXYD6	2.01796	4.05011	1.10393e-06
ENSG00000151364	KCTD14	0.604249	1.52019	1.11912e-06
ENSG00000173546	CSPG4	-0.860596	0.550725	1.15627e-06
ENSG00000152256	PDK1	0.533831	1.44777	1.24602e-06
ENSG00000128311	TST	0.403575	1.32278	1.43786e-06
ENSG00000131459	GFPT2	0.562834	1.47717	1.65591e-06
ENSG00000173156	RHOD	0.488418	1.40291	1.90084e-06
ENSG00000242173	ARHGDIG	0.624746	1.54194	2.0644e-06
ENSG00000167644	C19orf33	0.447025	1.36323	2.57791e-06
ENSG00000170542	SERPINB9	-0.401466	0.757089	3.10968e-06
ENSG00000113083	LOX	0.370777	1.29305	3.24908e-06
ENSG00000148341	SH3GLB2	0.281142	1.21516	3.62464e-06
ENSG00000105419	MEIS3	0.737468	1.66725	3.74752e-06
ENSG00000107798	LIPA	0.438068	1.35479	3.79759e-06
ENSG00000167815	PRDX2	0.358592	1.28217	3.79759e-06
ENSG00000072736	NFATC3	-0.465197	0.724372	4.15882e-06
ENSG00000103196	CRISPLD2	-0.382163	0.767286	4.24921e-06
ENSG00000162433	AK4	0.516228	1.43021	4.48004e-06
ENSG00000170689	HOXB9	0.758519	1.69175	5.09977e-06
ENSG00000149196	HIKESHI	0.394681	1.31465	5.40787e-06
ENSG00000167157	PRRX2	0.498849	1.41309	6.75539e-06
ENSG00000101000	PROCR	0.324344	1.25209	7.86056e-06
ENSG00000197565	COL4A6	-0.846037	0.556311	7.9422e-06
ENSG00000127561	SYNGR3	0.535849	1.44979	8.16774e-06
ENSG00000101335	MYL9	0.377571	1.29915	8.20489e-06
ENSG00000162618	ADGRL4	-0.910743	0.531911	8.89602e-06
ENSG00000179218	CALR	0.23238	1.17477	9.10599e-06
ENSG00000148671	ADIRF	0.379374	1.30078	9.38519e-06
ENSG00000162407	PLPP3	-0.483611	0.715185	9.39882e-06
ENSG00000204922	UQCC3	0.464517	1.37986	1.01815e-05
ENSG00000124243	BCAS4	0.506741	1.42084	1.09619e-05
ENSG00000100412	ACO2	0.232951	1.17524	1.22922e-05
ENSG00000049618	ARID1B	-0.407741	0.753803	1.65751e-05
ENSG00000148803	FUOM	0.489384	1.40385	1.68098e-05
ENSG00000174917	MICOS13	0.398827	1.31844	1.68401e-05
ENSG00000002586	CD99	0.270907	1.20657	1.74901e-05
ENSG00000167550	RHEBL1	0.533347	1.44728	1.79399e-05
ENSG00000118960	HS1BP3	0.366234	1.28898	1.79399e-05
ENSG00000176101	SSNA1	0.315068	1.24407	1.81929e-05
ENSG00000277443	MARCKS	-0.281417	0.822782	1.85147e-05
ENSG00000078401	EDN1	-0.31975	0.801209	1.85147e-05
ENSG00000165507	DEPP1	0.809575	1.75269	1.89602e-05
ENSG00000237187	NR2F1-AS1	0.605306	1.5213	1.97684e-05
ENSG00000135940	COX5B	0.387218	1.30787	2.02492e-05
ENSG00000128739	SNRPN	0.30565	1.23598	2.02492e-05
ENSG00000104723	TUSC3	0.722051	1.64952	2.07084e-05
ENSG00000138030	KHK	0.407838	1.3267	2.08857e-05
ENSG00000104524	PYCR3	0.394308	1.31431	2.31609e-05
ENSG00000182240	BACE2	0.820078	1.7655	2.34778e-05
ENSG00000145147	SLIT2	-0.375605	0.770782	2.54121e-05
ENSG00000127585	FBXL16	0.702617	1.62745	2.57602e-05
ENSG00000136111	TBC1D4	-0.387836	0.764275	2.58226e-05
ENSG00000189091	SF3B3	-0.424351	0.745174	2.61705e-05
ENSG00000151353	TMEM18	0.378384	1.29988	2.62976e-05
ENSG00000164736	SOX17	-0.666574	0.630001	2.64837e-05
ENSG00000137547	MRPL15	0.469509	1.38464	2.75622e-05
ENSG00000104442	ARMC1	0.391994	1.31221	3.30103e-05
ENSG00000182154	MRPL41	0.355787	1.27968	3.31201e-05
ENSG00000169692	AGPAT2	0.278917	1.21328	3.37689e-05
ENSG00000164587	RPS14	0.462748	1.37816	3.48309e-05
ENSG00000105404	RABAC1	0.303296	1.23396	3.62648e-05
ENSG00000108821	COL1A1	-0.7179	0.607982	3.75163e-05
ENSG00000136944	LMX1B	1.36813	2.58136	4.02482e-05
ENSG00000145861	C1QTNF2	0.566561	1.48099	4.13341e-05
ENSG00000113269	RNF130	0.301566	1.23248	4.13363e-05
ENSG00000065308	TRAM2	-0.321515	0.800229	4.13363e-05
ENSG00000164615	CAMLG	0.357085	1.28084	4.23407e-05
ENSG00000008517	IL32	0.503212	1.41737	4.29044e-05
ENSG00000153406	NMRAL1	0.340007	1.26576	4.35838e-05
ENSG00000171368	TPPP	1.07266	2.10331	4.51612e-05
ENSG00000165898	ISCA2	0.410674	1.32931	4.56918e-05
ENSG00000120992	LYPLA1	0.340269	1.26599	4.60249e-05
ENSG00000139211	AMIGO2	0.560217	1.47449	4.61783e-05
ENSG00000115041	KCNIP3	1.44707	2.72654	4.6477e-05
ENSG00000105472	CLEC11A	0.421897	1.33969	4.9559e-05
ENSG00000168569	TMEM223	0.378564	1.30005	5.0505e-05
ENSG00000159228	CBR1	0.386125	1.30688	5.53421e-05
ENSG00000115884	SDC1	0.340034	1.26579	5.53421e-05
ENSG00000189241	TSPYL1	-0.26438	0.832557	5.53421e-05
ENSG00000175782	SLC35E3	0.373402	1.2954	5.66577e-05
ENSG00000090013	BLVRB	0.31143	1.24094	5.67385e-05
ENSG00000138031	ADCY3	0.379155	1.30058	6.21698e-05
ENSG00000104522	GFUS	0.271096	1.20672	6.21698e-05
ENSG00000154319	FAM167A	-0.486385	0.713811	6.21698e-05
ENSG00000076641	PAG1	0.35387	1.27798	6.35093e-05
ENSG00000158470	B4GALT5	-0.260604	0.834738	6.35093e-05
ENSG00000125995	ROMO1	0.405407	1.32446	6.51466e-05
ENSG00000100097	LGALS1	0.364554	1.28748	6.54407e-05
ENSG00000152082	MZT2B	0.313302	1.24255	6.60166e-05
ENSG00000162434	JAK1	-0.326627	0.797399	6.60203e-05
ENSG00000181218	H2AW	0.465076	1.38039	6.84209e-05
ENSG00000069702	TGFBR3	-0.360702	0.778785	6.84209e-05
ENSG00000196611	MMP1	0.500697	1.4149	7.11957e-05
ENSG00000163349	HIPK1	-0.35662	0.780992	7.15879e-05
ENSG00000148834	GSTO1	0.452715	1.36861	7.37417e-05
ENSG00000120156	TEK	-0.411979	0.751592	7.37417e-05
ENSG00000143653	SCCPDH	0.288082	1.22102	7.71961e-05
ENSG00000165731	RET	1.09377	2.13432	7.83958e-05
ENSG00000187714	SLC18A3	-0.795531	0.576131	8.03488e-05
ENSG00000128052	KDR	-0.758081	0.591282	8.17704e-05
ENSG00000092820	EZR	-0.311052	0.806054	9.22442e-05
ENSG00000130600	H19	-0.681855	0.623363	9.40813e-05
ENSG00000152229	PSTPIP2	0.420271	1.33818	9.59012e-05
ENSG00000132466	ANKRD17	-0.350228	0.78446	9.60925e-05
ENSG00000124006	OBSL1	0.603247	1.51913	9.99199e-05
ENSG00000182054	IDH2	0.255008	1.19334	0.000102684
ENSG00000168477	TNXB	-0.883348	0.542108	0.000103147
ENSG00000197956	S100A6	0.310704	1.24031	0.000103428
ENSG00000104765	BNIP3L	0.290218	1.22283	0.000107412
ENSG00000087303	NID2	-0.626184	0.647888	0.000107412
ENSG00000125652	ALKBH7	0.425314	1.34286	0.000109753
ENSG00000166130	IKBIP	0.295019	1.2269	0.000109753
ENSG00000126432	PRDX5	0.299481	1.2307	0.0001106
ENSG00000085563	ABCB1	-1.02082	0.492837	0.000120348
ENSG00000117335	CD46	0.320099	1.24842	0.000122801
ENSG00000106638	TBL2	0.255663	1.19388	0.000123457
ENSG00000065911	MTHFD2	0.319466	1.24787	0.000128784
ENSG00000123104	ITPR2	-0.482804	0.715585	0.000131049
ENSG00000163453	IGFBP7	0.216872	1.16221	0.000133215
ENSG00000151640	DPYSL4	0.519356	1.43332	0.000134283
ENSG00000146066	HIGD2A	0.33419	1.26067	0.000138154
ENSG00000131495	NDUFA2	0.416601	1.33478	0.00013909
ENSG00000111859	NEDD9	-0.296397	0.814283	0.000139658
ENSG00000178078	STAP2	0.423416	1.3411	0.0001413
ENSG00000128641	MYO1B	-0.317237	0.802606	0.000150057
ENSG00000183617	MRPL54	0.420648	1.33853	0.000152563
ENSG00000137563	GGH	0.312898	1.2422	0.000154004
ENSG00000166037	CEP57	0.315589	1.24452	0.000159134
ENSG00000180879	SSR4	0.293383	1.22551	0.000159496
ENSG00000054148	PHPT1	0.356849	1.28063	0.000165075
ENSG00000186897	C1QL4	0.361056	1.28437	0.000166911
ENSG00000116586	LAMTOR2	0.291117	1.22359	0.000169582
ENSG00000100300	TSPO	0.251776	1.19067	0.000169582
ENSG00000136783	NIPSNAP3A	0.425812	1.34333	0.000173978
ENSG00000134278	SPIRE1	-0.304245	0.809866	0.000181629
ENSG00000243646	IL10RB	0.279334	1.21363	0.000181719
ENSG00000165233	CARD19	0.300277	1.23138	0.000183084
ENSG00000115129	TP53I3	0.353704	1.27784	0.000186484
ENSG00000099901	RANBP1	0.334059	1.26056	0.000186484
ENSG00000204642	HLA-F	0.591434	1.50674	0.000187335
ENSG00000196776	CD47	0.371735	1.29391	0.000187717
ENSG00000100316	RPL3	0.256313	1.19442	0.000187717
ENSG00000206538	VGLL3	-0.449586	0.732253	0.000187717
ENSG00000132688	NES	-0.677002	0.625464	0.00019704
ENSG00000276180	H4C9	0.451029	1.36701	0.0002092
ENSG00000106077	ABHD11	0.337123	1.26324	0.0002092
ENSG00000094916	CBX5	-0.279368	0.823952	0.0002092
ENSG00000143612	C1orf43	0.26631	1.20273	0.000211302
ENSG00000115425	PECR	0.452601	1.3685	0.000214529
ENSG00000112667	DNPH1	0.315636	1.24456	0.000214529
ENSG00000167994	RAB3IL1	0.546657	1.4607	0.000217998
ENSG00000004478	FKBP4	-0.227922	0.853864	0.000217998
ENSG00000123992	DNPEP	0.287144	1.22022	0.000218627
ENSG00000128309	MPST	0.240185	1.18114	0.000218627
ENSG00000184702	SEPTIN5	0.442693	1.35914	0.000219365
ENSG00000197457	STMN3	0.289312	1.22206	0.000219365
ENSG00000102109	PCSK1N	1.02235	2.03123	0.000220161
ENSG00000143514	TP53BP2	-0.319724	0.801223	0.000220161
ENSG00000142541	RPL13A	0.287852	1.22082	0.000221967
ENSG00000066135	KDM4A	-0.391353	0.762414	0.000221967
ENSG00000099849	RASSF7	0.392745	1.31289	0.000223523
ENSG00000240065	PSMB9	0.465767	1.38105	0.000224216
ENSG00000113328	CCNG1	0.247639	1.18726	0.000225011
ENSG00000239900	ADSL	0.339303	1.26515	0.000230343
ENSG00000184470	TXNRD2	0.257425	1.19534	0.000237087
ENSG00000087245	MMP2	-0.537271	0.689073	0.000237087
ENSG00000237172	B3GNT9	-0.557882	0.679299	0.000239445
ENSG00000131981	LGALS3	0.337248	1.26334	0.000244315
ENSG00000136942	RPL35	0.366201	1.28895	0.000245849
ENSG00000129625	REEP5	0.322904	1.25085	0.000245868
ENSG00000175216	CKAP5	-0.395461	0.760246	0.000249361
ENSG00000054282	SDCCAG8	0.557942	1.47217	0.000249781
ENSG00000161016	RPL8	0.376106	1.29783	0.000251371
ENSG00000119397	CNTRL	-0.54685	0.684513	0.000251371
ENSG00000135317	SNX14	0.246853	1.18662	0.000253961
ENSG00000163466	ARPC2	0.319908	1.24825	0.000262234
ENSG00000166794	PPIB	0.297124	1.22869	0.000262263
ENSG00000092010	PSME1	0.310125	1.23981	0.000262889
ENSG00000137106	GRHPR	0.28524	1.21861	0.000265317
ENSG00000172922	RNASEH2C	0.338179	1.26416	0.000266658
ENSG00000184990	SIVA1	0.305567	1.2359	0.000268183
ENSG00000167862	MRPL58	0.304243	1.23477	0.000268183
ENSG00000107223	EDF1	0.263063	1.20002	0.000291502
ENSG00000224858	RPL29P11	0.503173	1.41733	0.000301028
ENSG00000164442	CITED2	-0.219408	0.858918	0.000309133
ENSG00000162706	CADM3	-0.78796	0.579162	0.000312633
ENSG00000099795	NDUFB7	0.33301	1.25964	0.000314933
ENSG00000065883	CDK13	-0.432086	0.741189	0.0003207
ENSG00000125835	SNRPB	0.328419	1.25564	0.000321671
ENSG00000147677	EIF3H	0.30596	1.23624	0.000321671
ENSG00000166741	NNMT	0.326678	1.25412	0.000325764
ENSG00000132646	PCNA	0.351849	1.2762	0.000328398
ENSG00000171476	HOPX	0.501542	1.41573	0.000338799
ENSG00000175110	MRPS22	0.345033	1.27018	0.00033898
ENSG00000181104	F2R	0.357539	1.28124	0.000348719
ENSG00000103047	TANGO6	-0.330303	0.795369	0.000354928
ENSG00000106733	NMRK1	0.458576	1.37418	0.0003615
ENSG00000152952	PLOD2	0.225207	1.16895	0.000365765
ENSG00000114861	FOXP1	-0.278796	0.824278	0.000371397
ENSG00000100216	TOMM22	0.348621	1.27334	0.000379717
ENSG00000168016	TRANK1	-1.10893	0.463636	0.000394613
ENSG00000114942	EEF1B2	0.367488	1.2901	0.000404512
ENSG00000025800	KPNA6	-0.298173	0.813282	0.000408536
ENSG00000172493	AFF1	-0.439549	0.737365	0.000422711
ENSG00000107175	CREB3	0.28544	1.21878	0.000430448
ENSG00000136732	GYPC	0.270783	1.20646	0.000432607
ENSG00000104368	PLAT	0.286193	1.21942	0.000440159
ENSG00000076513	ANKRD13A	-0.275726	0.826035	0.000443827
ENSG00000156587	UBE2L6	0.320109	1.24843	0.000463047
ENSG00000112308	C6orf62	-0.326577	0.797427	0.000463047
ENSG00000112282	MED23	-0.512034	0.701233	0.000463047
ENSG00000173141	MRPL57	0.37627	1.29798	0.000469909
ENSG00000076043	REXO2	0.346967	1.27188	0.000469909
ENSG00000162244	RPL29	0.30059	1.23165	0.000469909
ENSG00000176171	BNIP3	0.300237	1.23135	0.000469909
ENSG00000022267	FHL1	-0.413878	0.750603	0.000469909
ENSG00000100075	SLC25A1	0.305784	1.23609	0.000488132
ENSG00000142156	COL6A1	0.483551	1.39818	0.000490274
ENSG00000146072	TNFRSF21	-1.15849	0.447983	0.000492785
ENSG00000088367	EPB41L1	0.320287	1.24858	0.000529104
ENSG00000243678	NME2	0.318712	1.24722	0.000529104
ENSG00000107833	NPM3	0.380338	1.30165	0.000533712
ENSG00000177600	RPLP2	0.236811	1.17838	0.000542495
ENSG00000007264	MATK	0.416585	1.33476	0.000542979
ENSG00000090530	P3H2	-0.327223	0.797069	0.000557926
ENSG00000250479	CHCHD10	0.458295	1.37392	0.00056133
ENSG00000197958	RPL12	0.269582	1.20546	0.000574031
ENSG00000151892	GFRA1	-0.530422	0.692352	0.000580088
ENSG00000168807	SNTB2	-0.3266	0.797413	0.000580178
ENSG00000100372	SLC25A17	0.368769	1.29125	0.000610545
ENSG00000120053	GOT1	0.272043	1.20752	0.000611708
ENSG00000015475	BID	0.337217	1.26332	0.000614232
ENSG00000186010	NDUFA13	0.352035	1.27636	0.000620564
ENSG00000101444	AHCY	0.246432	1.18627	0.000634065
ENSG00000109572	CLCN3	-0.393891	0.761074	0.000635319
ENSG00000261740	BOLA2-SMG1P6	0.377474	1.29907	0.000646225
ENSG00000002330	BAD	0.273104	1.2084	0.000646225
ENSG00000197043	ANXA6	0.257287	1.19523	0.000646225
ENSG00000172954	LCLAT1	0.314129	1.24326	0.000646529
ENSG00000167600	CYP2S1	0.494121	1.40846	0.000657237
ENSG00000148175	STOM	0.331765	1.25855	0.000657237
ENSG00000041982	TNC	1.13799	2.20074	0.000660637
ENSG00000171222	SCAND1	0.260312	1.19774	0.000662367
ENSG00000204381	LAYN	0.584237	1.49925	0.000676571
ENSG00000105640	RPL18A	0.313203	1.24246	0.0006781
ENSG00000213593	TMX2	0.297399	1.22893	0.0006781
ENSG00000233369	GTF2IP4	-0.507451	0.703464	0.0006781
ENSG00000100167	SEPTIN3	1.19832	2.29473	0.000685133
ENSG00000221968	FADS3	0.239316	1.18043	0.000685133
ENSG00000095015	MAP3K1	-0.302518	0.810836	0.000688575
ENSG00000204941	PSG5	0.532976	1.44691	0.000688875
ENSG00000115234	SNX17	0.256392	1.19449	0.000688875
ENSG00000115325	DOK1	0.302869	1.23359	0.000705275
ENSG00000176340	COX8A	0.230884	1.17355	0.000705275
ENSG00000166266	CUL5	0.242025	1.18265	0.000714987
ENSG00000239713	APOBEC3G	0.649893	1.56905	0.000721128
ENSG00000164967	RPP25L	0.381651	1.30283	0.000721128
ENSG00000104529	EEF1D	0.243269	1.18367	0.000721128
ENSG00000103264	FBXO31	-0.300398	0.812028	0.00076817
ENSG00000079462	PAFAH1B3	0.275201	1.21016	0.00077458
ENSG00000054523	KIF1B	-0.259584	0.835329	0.000777325
ENSG00000143158	MPC2	0.332688	1.25936	0.000778531
ENSG00000183828	NUDT14	0.302711	1.23346	0.000786451
ENSG00000226287	TMEM191A	0.780658	1.71791	0.000798488
ENSG00000115380	EFEMP1	0.288068	1.221	0.000807081
ENSG00000070087	PFN2	0.46289	1.3783	0.000814767
ENSG00000196890	H2BU1	0.338709	1.26462	0.000826469
ENSG00000138207	RBP4	0.787845	1.72649	0.000834685
ENSG00000126878	AIF1L	0.317915	1.24653	0.000858605
ENSG00000172428	COPS9	0.357633	1.28132	0.000860193
ENSG00000173272	MZT2A	0.321829	1.24991	0.000860193
ENSG00000163347	CLDN1	-0.441391	0.736424	0.000860193
ENSG00000213347	MXD3	0.350817	1.27528	0.00086606
ENSG00000171848	RRM2	0.229663	1.17256	0.000896363
ENSG00000102908	NFAT5	-0.53466	0.690321	0.00089675
ENSG00000162444	RBP7	0.914277	1.88462	0.00091185
ENSG00000141934	PLPP2	0.482021	1.3967	0.000915397
ENSG00000168273	SMIM4	0.430209	1.34743	0.000954277
ENSG00000135069	PSAT1	0.29014	1.22276	0.000961871
ENSG00000105372	RPS19	0.292893	1.22509	0.000970515
ENSG00000021826	CPS1	-0.540028	0.687758	0.000972266
ENSG00000159792	PSKH1	0.514303	1.4283	0.000990155
ENSG00000020633	RUNX3	1.16875	2.24816	0.0010173
ENSG00000132563	REEP2	0.460924	1.37642	0.00101842
ENSG00000111641	NOP2	-0.289191	0.818361	0.00102402
ENSG00000154734	ADAMTS1	-0.405701	0.75487	0.00102402
ENSG00000073614	KDM5A	-0.260854	0.834594	0.00104451
ENSG00000164211	STARD4	0.300373	1.23146	0.00104797
ENSG00000148926	ADM	0.26261	1.19965	0.00104797
ENSG00000130779	CLIP1	-0.280771	0.823151	0.00111179
ENSG00000243927	MRPS6	0.41257	1.33105	0.00111535
ENSG00000153561	RMND5A	-0.412633	0.751251	0.00111535
ENSG00000063241	ISOC2	0.277512	1.2121	0.00112881
ENSG00000092445	TYRO3	0.328021	1.25529	0.00113008
ENSG00000165637	VDAC2	0.238195	1.17952	0.00113008
ENSG00000162191	UBXN1	0.229158	1.17215	0.00115344
ENSG00000091640	SPAG7	0.245079	1.18516	0.00121158
ENSG00000082014	SMARCD3	0.42531	1.34286	0.00122073
ENSG00000170619	COMMD5	0.275164	1.21013	0.00128013
ENSG00000010292	NCAPD2	-0.249649	0.841101	0.00128955
ENSG00000153162	BMP6	-0.403246	0.756155	0.00129129
ENSG00000177054	ZDHHC13	0.335412	1.26174	0.00129283
ENSG00000177156	TALDO1	0.215584	1.16117	0.00129565
ENSG00000149090	PAMR1	0.56296	1.4773	0.00130974
ENSG00000277209	RPPH1	0.427214	1.34463	0.00130974
ENSG00000064419	TNPO3	-0.219194	0.859045	0.00130974
ENSG00000153904	DDAH1	-0.29535	0.814874	0.00130974
ENSG00000142227	EMP3	-1.03395	0.48837	0.00130974
ENSG00000127838	PNKD	0.355203	1.27917	0.00131342
ENSG00000134046	MBD2	-0.435688	0.739341	0.00136442
ENSG00000163754	GYG1	0.346568	1.27153	0.00137036
ENSG00000164400	CSF2	1.15907	2.23313	0.00137452
ENSG00000136425	CIB2	0.563653	1.47801	0.00137452
ENSG00000173960	UBXN2A	0.308916	1.23878	0.00139327
ENSG00000225830	ERCC6	-0.321259	0.800371	0.00139356
ENSG00000145912	NHP2	0.296808	1.22842	0.00141336
ENSG00000244274	DBNDD2	0.309821	1.23955	0.00143589
ENSG00000163382	NAXE	0.283294	1.21697	0.00144281
ENSG00000176485	PLAAT3	0.246869	1.18663	0.0014536
ENSG00000147123	NDUFB11	0.182585	1.13492	0.00150287
ENSG00000120256	LRP11	-0.309518	0.806911	0.00154639
ENSG00000172175	MALT1	-0.283047	0.821854	0.00157
ENSG00000105825	TFPI2	-0.711366	0.610742	0.00157
ENSG00000127481	UBR4	-0.267142	0.830964	0.00157757
ENSG00000128510	CPA4	-0.289108	0.818408	0.00157757
ENSG00000130449	ZSWIM6	-0.331609	0.79465	0.00157757
ENSG00000084733	RAB10	0.241528	1.18224	0.00158742
ENSG00000091527	CDV3	-0.300305	0.812081	0.00158742
ENSG00000110851	PRDM4	-0.295486	0.814798	0.00159501
ENSG00000139428	MMAB	0.306803	1.23696	0.00159682
ENSG00000183628	DGCR6	0.542467	1.45646	0.00159922
ENSG00000164405	UQCRQ	0.333421	1.26	0.00160348
ENSG00000110711	AIP	0.2174	1.16264	0.00161761
ENSG00000134330	IAH1	0.39382	1.31387	0.00161878
ENSG00000074842	MYDGF	0.210583	1.15716	0.00162962
ENSG00000159231	CBR3	0.310865	1.24045	0.00163368
ENSG00000197766	CFD	0.610224	1.5265	0.00166486
ENSG00000170153	RNF150	-0.422425	0.746169	0.00168605
ENSG00000211450	SELENOH	0.270278	1.20604	0.00170317
ENSG00000068912	ERLEC1	0.263714	1.20057	0.0017102
ENSG00000153071	DAB2	-0.359165	0.779616	0.00174065
ENSG00000184924	PTRHD1	0.320722	1.24896	0.0017643
ENSG00000272693	LOC441242	-2.71227	0.15259	0.00176625
ENSG00000198286	CARD11	0.488031	1.40253	0.00179866
ENSG00000205544	TMEM256	0.365946	1.28873	0.00184605
ENSG00000116688	MFN2	-0.214528	0.861828	0.00185527
ENSG00000178252	WDR6	-0.298046	0.813353	0.0018591
ENSG00000136193	SCRN1	-0.21806	0.859721	0.00186207
ENSG00000128340	RAC2	0.32492	1.25259	0.00186811
ENSG00000196821	ILRUN	-0.252366	0.839519	0.00186811
ENSG00000009307	CSDE1	-0.27518	0.826347	0.00186811
ENSG00000137834	SMAD6	-0.396761	0.759562	0.00189377
ENSG00000177106	EPS8L2	0.53849	1.45245	0.00189817
ENSG00000170889	RPS9	0.312008	1.24143	0.00190039
ENSG00000124067	SLC12A4	-0.236786	0.848634	0.00190835
ENSG00000169594	BNC1	-0.27495	0.826479	0.00196606
ENSG00000166228	PCBD1	0.257643	1.19552	0.00198339
ENSG00000100321	SYNGR1	0.471431	1.38648	0.00200858
ENSG00000100417	PMM1	0.338233	1.26421	0.00200858
ENSG00000124789	NUP153	-0.243479	0.844706	0.00200858
ENSG00000128185	DGCR6L	0.260375	1.19779	0.00204363
ENSG00000144320	LNPK	0.281111	1.21513	0.00208324
ENSG00000100888	CHD8	-0.244551	0.844078	0.00209002
ENSG00000099194	SCD	0.316039	1.24491	0.00210219
ENSG00000104375	STK3	0.359211	1.28272	0.00210919
ENSG00000174547	MRPL11	0.28922	1.22198	0.00215975
ENSG00000110917	MLEC	-0.418769	0.748063	0.00215975
ENSG00000129197	RPAIN	0.303514	1.23415	0.00220966
ENSG00000169282	KCNAB1	0.382245	1.30337	0.00221289
ENSG00000148908	RGS10	0.338387	1.26434	0.00222237
ENSG00000224470	ATXN1L	-0.284348	0.821113	0.00222318
ENSG00000074201	CLNS1A	0.256863	1.19488	0.00226707
ENSG00000204525	HLA-C	0.292182	1.22449	0.00228621
ENSG00000121060	TRIM25	-0.249955	0.840922	0.00228939
ENSG00000237190	CDKN2AIPNL	0.306756	1.23692	0.00229255
ENSG00000187051	RPS19BP1	0.252958	1.19165	0.00229255
ENSG00000188486	H2AX	0.230731	1.17343	0.00229255
ENSG00000183011	NAA38	0.338443	1.26439	0.00229702
ENSG00000173726	TOMM20	0.298367	1.22975	0.0023034
ENSG00000187514	PTMA	0.268351	1.20443	0.0023034
ENSG00000127884	ECHS1	0.261096	1.19839	0.0023034
ENSG00000021776	AQR	-0.221719	0.857543	0.0023034
ENSG00000278615	C11orf98	0.341614	1.26717	0.00231178
ENSG00000005448	WDR54	0.250559	1.18967	0.00235858
ENSG00000125538	IL1B	0.745444	1.67649	0.00239541
ENSG00000136518	ACTL6A	0.247395	1.18706	0.00239541
ENSG00000003756	RBM5	-0.383004	0.766839	0.00241948
ENSG00000040608	RTN4R	0.594076	1.50951	0.0024279
ENSG00000078369	GNB1	-0.214124	0.86207	0.00244741
ENSG00000070770	CSNK2A2	-0.25379	0.83869	0.00244741
ENSG00000105810	CDK6	-0.304698	0.809611	0.00245769
ENSG00000189376	C8orf76	0.422668	1.3404	0.00248699
ENSG00000163399	ATP1A1	-0.273544	0.827285	0.00248699
ENSG00000090661	CERS4	0.380953	1.3022	0.00249476
ENSG00000177556	ATOX1	0.281946	1.21583	0.00250615
ENSG00000120913	PDLIM2	0.216325	1.16177	0.00250615
ENSG00000103152	MPG	0.209705	1.15645	0.00253502
ENSG00000162775	RBM15	-0.232673	0.851057	0.00253502
ENSG00000160294	MCM3AP	-0.301817	0.81123	0.00253502
ENSG00000179562	GCC1	-0.356751	0.780921	0.00253597
ENSG00000116191	RALGPS2	-0.466747	0.723594	0.00255838
ENSG00000005893	LAMP2	0.204818	1.15254	0.00256149
ENSG00000120306	CYSTM1	0.266186	1.20262	0.00259035
ENSG00000136908	DPM2	0.237957	1.17932	0.00265733
ENSG00000162174	ASRGL1	0.407051	1.32597	0.00270597
ENSG00000119655	NPC2	0.195673	1.14526	0.00270597
ENSG00000223802	CERS1	0.580031	1.49488	0.00270913
ENSG00000124357	NAGK	0.288427	1.22131	0.00283096
ENSG00000249751	ECSCR	0.217577	1.16278	0.00290527
ENSG00000004779	NDUFAB1	0.271559	1.20711	0.00290655
ENSG00000140199	SLC12A6	-0.43752	0.738403	0.00296912
ENSG00000258376	AC004846.1	0.545108	1.45913	0.00298836
ENSG00000172590	MRPL52	0.315022	1.24403	0.00298836
ENSG00000168958	MFF	0.233753	1.17589	0.00300045
ENSG00000196428	TSC22D2	-0.403645	0.755946	0.00301797
ENSG00000137274	BPHL	0.441539	1.35805	0.0030295
ENSG00000155508	CNOT8	0.298493	1.22986	0.0030295
ENSG00000151135	TMEM263	0.209181	1.15603	0.00305526
ENSG00000178096	BOLA1	0.402403	1.32171	0.00306131
ENSG00000169689	CENPX	0.317775	1.24641	0.00306131
ENSG00000135597	REPS1	-0.291179	0.817234	0.00307843
ENSG00000075239	ACAT1	0.358549	1.28214	0.00309618
ENSG00000055950	MRPL43	0.269098	1.20505	0.00309618
ENSG00000176532	PRR15	-0.899594	0.536038	0.00309618
ENSG00000083799	CYLD	-0.466748	0.723594	0.00314044
ENSG00000167077	MEI1	0.539018	1.45298	0.00316709
ENSG00000110063	DCPS	0.407535	1.32642	0.00318545
ENSG00000092096	SLC22A17	0.944101	1.92399	0.00323444
ENSG00000156603	MED19	0.307023	1.23715	0.00325294
ENSG00000113742	CPEB4	-0.336869	0.791758	0.00328979
ENSG00000261371	PECAM1	-0.221978	0.857389	0.00331682
ENSG00000140718	FTO	-0.33098	0.794996	0.00334607
ENSG00000180155	LYNX1	0.64307	1.56165	0.00337252
ENSG00000140526	ABHD2	-0.360388	0.778955	0.00339798
ENSG00000177700	POLR2L	0.277253	1.21189	0.00341723
ENSG00000137710	RDX	0.316009	1.24488	0.00347128
ENSG00000213619	NDUFS3	0.220521	1.16515	0.00347128
ENSG00000132254	ARFIP2	0.201234	1.14968	0.00347187
ENSG00000118971	CCND2	-0.934117	0.523363	0.00348918
ENSG00000100865	CINP	0.235784	1.17755	0.00359712
ENSG00000174851	YIF1A	0.233288	1.17551	0.00359712
ENSG00000171314	PGAM1	0.209328	1.15615	0.00359712
ENSG00000130255	RPL36	0.315249	1.24423	0.00362096
ENSG00000160948	VPS28	0.242366	1.18293	0.00362096
ENSG00000148335	NTMT1	0.250096	1.18929	0.00363942
ENSG00000128228	SDF2L1	0.250141	1.18932	0.00364442
ENSG00000027075	PRKCH	-0.243103	0.844926	0.00364442
ENSG00000127445	PIN1	0.199752	1.1485	0.00371286
ENSG00000231924	PSG1	-0.587578	0.665459	0.00371286
ENSG00000182636	NDN	0.240643	1.18152	0.0037463
ENSG00000108010	GLRX3	0.299117	1.23039	0.00374802
ENSG00000143753	DEGS1	0.210554	1.15713	0.00374802
ENSG00000116985	BMP8B	0.426347	1.34383	0.00375677
ENSG00000183597	TANGO2	0.304893	1.23533	0.00375677
ENSG00000102158	MAGT1	0.244782	1.18491	0.00375677
ENSG00000141698	NT5C3B	0.235326	1.17717	0.00375677
ENSG00000198018	ENTPD7	-0.289996	0.817905	0.00375677
ENSG00000084754	HADHA	0.164784	1.121	0.00376039
ENSG00000134308	YWHAQ	0.233499	1.17568	0.00379403
ENSG00000170471	RALGAPB	-0.301991	0.811132	0.00381687
ENSG00000166897	ELFN2	0.593233	1.50862	0.00382085
ENSG00000154146	NRGN	0.413154	1.33159	0.00384865
ENSG00000083857	FAT1	-0.335445	0.792539	0.00391983
ENSG00000231500	RPS18	0.321913	1.24999	0.00393323
ENSG00000214435	AS3MT	0.502892	1.41705	0.00397339
ENSG00000183798	EMILIN3	0.59087	1.50615	0.00397685
ENSG00000034510	TMSB10	0.288872	1.22169	0.0039839
ENSG00000129103	SUMF2	0.186384	1.13791	0.0039839
ENSG00000139112	GABARAPL1	-0.37627	0.770427	0.0040035
ENSG00000102802	MEDAG	-0.41232	0.751414	0.0040035
ENSG00000183569	SERHL2	0.63924	1.55751	0.00406204
ENSG00000127337	YEATS4	0.329689	1.25674	0.00410075
ENSG00000162729	IGSF8	0.325847	1.2534	0.00414273
ENSG00000044574	HSPA5	0.282751	1.21651	0.00414273
ENSG00000103363	ELOB	0.279513	1.21379	0.00414273
ENSG00000114125	RNF7	0.25257	1.19133	0.00414273
ENSG00000106803	SEC61B	0.24035	1.18128	0.00414273
ENSG00000104889	RNASEH2A	0.234382	1.1764	0.00414273
ENSG00000153048	CARHSP1	0.215089	1.16078	0.00414273
ENSG00000110717	NDUFS8	0.210835	1.15736	0.00414273
ENSG00000206503	HLA-A	0.207134	1.15439	0.00414273
ENSG00000112531	QKI	-0.307284	0.808162	0.00414273
ENSG00000103034	NDRG4	-0.529438	0.692824	0.00414273
ENSG00000105963	ADAP1	0.529486	1.44342	0.00417217
ENSG00000105976	MET	-0.276499	0.825592	0.00419069
ENSG00000172731	LRRC20	0.251507	1.19045	0.00419152
ENSG00000137692	DCUN1D5	0.261752	1.19893	0.00423088
ENSG00000048140	TSPAN17	0.200266	1.14891	0.00424728
ENSG00000166333	ILK	0.227024	1.17042	0.00426955
ENSG00000100393	EP300	0.334845	1.26124	0.00427781
ENSG00000154917	RAB6B	0.405399	1.32446	0.00431818
ENSG00000130414	NDUFA10	0.236645	1.17825	0.00431818
ENSG00000168393	DTYMK	0.220573	1.1652	0.00431818
ENSG00000127022	CANX	0.193891	1.14384	0.00434515
ENSG00000143870	PDIA6	0.223843	1.16784	0.00436135
ENSG00000127334	DYRK2	-0.320426	0.800833	0.00442821
ENSG00000068615	REEP1	0.990112	1.98634	0.00446056
ENSG00000170881	RNF139	0.29873	1.23006	0.00448495
ENSG00000171873	ADRA1D	1.55348	2.93524	0.00451165
ENSG00000276291	FRG1HP	0.367967	1.29053	0.00453387
ENSG00000111678	C12orf57	0.258608	1.19632	0.00455098
ENSG00000183530	PRR14L	-0.400564	0.757562	0.00455098
ENSG00000183889	AC138969.1	-0.506939	0.703714	0.00455098
ENSG00000143622	RIT1	0.369161	1.2916	0.00459235
ENSG00000169567	HINT1	0.271483	1.20705	0.00459235
ENSG00000104332	SFRP1	-0.318245	0.802045	0.00459235
ENSG00000159753	CARMIL2	0.712879	1.63907	0.00460614
ENSG00000151576	QTRT2	-0.329049	0.796061	0.00462127
ENSG00000164091	WDR82	-0.208488	0.865443	0.00462779
ENSG00000140829	DHX38	-0.323468	0.799147	0.0046447
ENSG00000051596	THOC3	0.197583	1.14678	0.00472411
ENSG00000185187	SIGIRR	0.295478	1.22729	0.0047373
ENSG00000188130	MAPK12	0.221838	1.16622	0.0047373
ENSG00000198162	MAN1A2	-0.316838	0.802827	0.0047373
ENSG00000197472	ZNF695	0.474527	1.38946	0.00474538
ENSG00000160932	LY6E	0.251734	1.19064	0.00474538
ENSG00000158669	GPAT4	-0.221102	0.85791	0.00474538
ENSG00000014914	MTMR11	-0.47091	0.721509	0.0047844
ENSG00000287979	AC253572.1	-0.579824	0.669045	0.00480377
ENSG00000160326	SLC2A6	0.331843	1.25862	0.00484445
ENSG00000103202	NME4	0.19118	1.1417	0.00485052
ENSG00000164741	DLC1	-0.241259	0.846007	0.00486538
ENSG00000182180	MRPS16	0.242328	1.1829	0.00488187
ENSG00000103253	HAGHL	0.649381	1.56849	0.00491918
ENSG00000137509	PRCP	0.301478	1.23241	0.00491918
ENSG00000111057	KRT18	-0.192757	0.874932	0.00494013
ENSG00000147403	RPL10	0.213991	1.15989	0.00501275
ENSG00000169223	LMAN2	0.225124	1.16888	0.00505656
ENSG00000152377	SPOCK1	0.629257	1.54677	0.00507232
ENSG00000188690	UROS	0.318348	1.2469	0.00507232
ENSG00000092847	AGO1	-0.246567	0.8429	0.00507232
ENSG00000084463	WBP11	-0.261783	0.834056	0.00507232
ENSG00000102910	LONP2	-0.264286	0.83261	0.00513467
ENSG00000132600	PRMT7	-0.288301	0.818866	0.00514306
ENSG00000108107	RPL28	0.230351	1.17312	0.00516081
ENSG00000230124	ACBD6	0.203284	1.15132	0.00522438
ENSG00000140386	SCAPER	-0.504294	0.705005	0.00524272
ENSG00000154144	TBRG1	0.338597	1.26453	0.00528609
ENSG00000147162	OGT	-0.364869	0.776539	0.00528609
ENSG00000068079	IFI35	0.290512	1.22307	0.00530439
ENSG00000100577	GSTZ1	0.332669	1.25934	0.00533087
ENSG00000187688	TRPV2	0.228018	1.17123	0.00540327
ENSG00000250899	AC125807.2	-0.461368	0.726297	0.00543099
ENSG00000069482	GAL	0.563948	1.47831	0.00545261
ENSG00000144048	DUSP11	0.342399	1.26786	0.00545529
ENSG00000196072	BLOC1S2	0.328658	1.25584	0.00551883
ENSG00000043591	ADRB1	-0.380485	0.768179	0.00552011
ENSG00000109171	SLAIN2	-0.401424	0.757111	0.00553442
ENSG00000143420	ENSA	0.185736	1.1374	0.00558728
ENSG00000158716	DUSP23	-0.943087	0.520119	0.00558728
ENSG00000186951	PPARA	0.493463	1.40782	0.00560615
ENSG00000130396	AFDN	-0.285905	0.820227	0.00560615
ENSG00000242114	MTFP1	0.240334	1.18127	0.00561284
ENSG00000115484	CCT4	0.26073	1.19809	0.0057154
ENSG00000198755	RPL10A	0.224121	1.16807	0.0057514
ENSG00000100162	CENPM	0.278628	1.21304	0.0057903
ENSG00000160213	CSTB	0.265605	1.20214	0.0057903
ENSG00000157933	SKI	-0.317869	0.802254	0.0057903
ENSG00000163923	RPL39L	0.331231	1.25809	0.00579057
ENSG00000063177	RPL18	0.237925	1.1793	0.00579057
ENSG00000131871	SELENOS	0.216943	1.16227	0.00579057
ENSG00000168785	TSPAN5	-0.269429	0.829648	0.00579057
ENSG00000101265	RASSF2	1.49264	2.81403	0.00580608
ENSG00000169220	RGS14	0.505419	1.41954	0.00580608
ENSG00000160179	ABCG1	0.353773	1.2779	0.00580608
ENSG00000115073	ACTR1B	0.185199	1.13697	0.0058359
ENSG00000188643	S100A16	0.161816	1.11869	0.00587797
ENSG00000112159	MDN1	-0.382452	0.767133	0.00588558
ENSG00000262664	OVCA2	0.251283	1.19027	0.00598487
ENSG00000004455	AK2	0.194569	1.14438	0.00598487
ENSG00000106144	CASP2	-0.347947	0.785701	0.00598487
ENSG00000026103	FAS	0.46163	1.3771	0.00598948
ENSG00000167654	ATCAY	0.656781	1.57656	0.00599381
ENSG00000134531	EMP1	-0.65617	0.634561	0.00602176
ENSG00000149582	TMEM25	0.326682	1.25413	0.00603406
ENSG00000122642	FKBP9	-0.273934	0.827061	0.00603406
ENSG00000144824	PHLDB2	-0.223474	0.856501	0.00622243
ENSG00000222041	CYTOR	0.300454	1.23153	0.00624645
ENSG00000160209	PDXK	0.245923	1.18585	0.00628926
ENSG00000143198	MGST3	0.259723	1.19725	0.00630539
ENSG00000084234	APLP2	0.353355	1.27753	0.00634421
ENSG00000074657	ZNF532	-0.394157	0.760934	0.00641308
ENSG00000090621	PABPC4	-0.198611	0.871389	0.00646371
ENSG00000128602	SMO	0.479012	1.39379	0.00647488
ENSG00000160256	FAM207A	0.243347	1.18374	0.00647488
ENSG00000175390	EIF3F	0.19171	1.14212	0.00648089
ENSG00000143553	SNAPIN	0.244277	1.1845	0.00652388
ENSG00000143436	MRPL9	0.235893	1.17764	0.00662926
ENSG00000160190	SLC37A1	0.715786	1.64238	0.00664395
ENSG00000255284	LOC171391	0.514159	1.42816	0.00664395
ENSG00000126107	HECTD3	-0.264031	0.832758	0.00664395
ENSG00000150347	ARID5B	-0.288299	0.818867	0.00664395
ENSG00000168395	ING5	0.244569	1.18474	0.00664845
ENSG00000172531	PPP1CA	0.193312	1.14339	0.00670488
ENSG00000118482	PHF3	-0.244247	0.844257	0.00670488
ENSG00000166681	BEX3	0.21591	1.16144	0.00671965
ENSG00000104133	SPG11	-0.362704	0.777706	0.00673332
ENSG00000115159	GPD2	-0.609262	0.655532	0.00674524
ENSG00000197081	IGF2R	-0.313358	0.804766	0.00675898
ENSG00000076067	RBMS2	-0.34156	0.789188	0.00678724
ENSG00000101146	RAE1	0.250981	1.19002	0.00680771
ENSG00000104549	SQLE	0.219132	1.16403	0.00680771
ENSG00000267855	NDUFA7	0.254008	1.19252	0.00682022
ENSG00000184076	UQCR10	0.291302	1.22374	0.00689152
ENSG00000149313	AASDHPPT	0.338215	1.26419	0.00693038
ENSG00000104341	LAPTM4B	0.247343	1.18702	0.00698891
ENSG00000111961	SASH1	-0.256701	0.837	0.0070236
ENSG00000155561	NUP205	-0.345778	0.786884	0.00706989
ENSG00000170270	GON7	0.383859	1.30483	0.00716067
ENSG00000184584	STING1	0.252615	1.19136	0.00719644
ENSG00000115317	HTRA2	0.205018	1.1527	0.0072281
ENSG00000183155	RABIF	0.297147	1.22871	0.0072448
ENSG00000160752	FDPS	0.252899	1.1916	0.00726764
ENSG00000149547	EI24	0.228797	1.17186	0.00733765
ENSG00000242259	C22orf39	0.228504	1.17162	0.00735024
ENSG00000068697	LAPTM4A	0.288184	1.2211	0.00735254
ENSG00000166441	RPL27A	0.309462	1.23925	0.0074621
ENSG00000175061	SNHG29	0.275948	1.21079	0.00746418
ENSG00000179403	VWA1	0.470989	1.38606	0.00755993
ENSG00000184182	UBE2F	0.299959	1.23111	0.0075628
ENSG00000092853	CLSPN	-0.388636	0.763852	0.00757549
ENSG00000116663	FBXO6	0.592444	1.5078	0.00772793
ENSG00000149150	SLC43A1	0.481357	1.39606	0.00779294
ENSG00000168994	PXDC1	-0.21439	0.86191	0.00782852
ENSG00000128590	DNAJB9	0.384664	1.30556	0.00791207
ENSG00000171103	TRMT61B	0.324819	1.25251	0.00793715
ENSG00000169021	UQCRFS1	0.23992	1.18093	0.00795354
ENSG00000148824	MTG1	0.23627	1.17794	0.00812321
ENSG00000160200	CBS	0.515105	1.4291	0.00814163
ENSG00000085117	CD82	0.363641	1.28667	0.00815299
ENSG00000181751	MACIR	0.286308	1.21952	0.00817221
ENSG00000158042	MRPL17	0.250215	1.18938	0.00817221
ENSG00000140400	MAN2C1	-0.217798	0.859877	0.00817221
ENSG00000111602	TIMELESS	-0.212538	0.863017	0.00817384
ENSG00000130770	ATP5IF1	0.215164	1.16084	0.00829907
ENSG00000070018	LRP6	-0.405598	0.754923	0.00834463
ENSG00000166002	SMCO4	0.513885	1.42789	0.00838234
ENSG00000065802	ASB1	0.305603	1.23594	0.00851096
ENSG00000167522	ANKRD11	-0.280917	0.823068	0.00851096
ENSG00000131094	C1QL1	0.53829	1.45225	0.00853798
ENSG00000169439	SDC2	0.253979	1.19249	0.00853798
ENSG00000104964	TLE5	0.202439	1.15064	0.00853798
ENSG00000008311	AASS	-0.387329	0.764544	0.00853798
ENSG00000186260	MRTFB	-0.387442	0.764484	0.00853798
ENSG00000128908	INO80	-0.28026	0.823443	0.00856934
ENSG00000126522	ASL	0.211272	1.15771	0.00857959
ENSG00000136114	THSD1	0.205369	1.15298	0.00860562
ENSG00000005059	MCUB	0.283658	1.21728	0.00863545
ENSG00000137100	DCTN3	0.274539	1.20961	0.00863545
ENSG00000168899	VAMP5	0.39024	1.31061	0.00864556
ENSG00000107104	KANK1	-0.23854	0.847602	0.00864556
ENSG00000144485	HES6	0.337874	1.26389	0.00866804
ENSG00000164930	FZD6	0.231413	1.17398	0.00867397
ENSG00000164209	SLC25A46	0.19535	1.145	0.00870133
ENSG00000108298	RPL19	0.286428	1.21962	0.00872891
ENSG00000166233	ARIH1	-0.412723	0.751204	0.00872891
ENSG00000140873	ADAMTS18	-1.52581	0.347285	0.00872891
ENSG00000130560	UBAC1	0.181373	1.13396	0.00874698
ENSG00000163191	S100A11	0.178457	1.13167	0.00874698
ENSG00000110074	FOXRED1	0.227015	1.17041	0.00877141
ENSG00000115145	STAM2	0.335931	1.26219	0.00877489
ENSG00000188290	HES4	0.238018	1.17937	0.00878935
ENSG00000119900	OGFRL1	-0.21437	0.861922	0.00878935
ENSG00000159176	CSRP1	0.172565	1.12706	0.0088131
ENSG00000166946	CCNDBP1	0.283581	1.21721	0.00886441
ENSG00000188677	PARVB	0.222224	1.16653	0.00889181
ENSG00000132182	NUP210	0.591312	1.50662	0.0089249
ENSG00000114631	PODXL2	0.480422	1.39515	0.0089249
ENSG00000214253	FIS1	0.23812	1.17945	0.0089249
ENSG00000100596	SPTLC2	-0.280391	0.823368	0.00898193
ENSG00000112584	FAM120B	-0.365822	0.776027	0.00898761
ENSG00000168646	AXIN2	-0.513121	0.700705	0.00904529
ENSG00000233276	GPX1	0.235771	1.17754	0.0090456
ENSG00000176595	KBTBD11	0.699691	1.62416	0.00906227
ENSG00000175701	MTLN	0.364486	1.28742	0.00907707
ENSG00000075151	EIF4G3	-0.241124	0.846086	0.00907707
ENSG00000173818	ENDOV	0.324633	1.25235	0.00907941
ENSG00000100142	POLR2F	0.279597	1.21386	0.00907941
ENSG00000125826	RBCK1	0.201802	1.15013	0.00909036
ENSG00000010438	PRSS3	0.369544	1.29194	0.00910907
ENSG00000161888	SPC24	0.169265	1.12449	0.00925781
ENSG00000170989	S1PR1	-0.225114	0.855527	0.00938389
ENSG00000206341	HLA-H	0.335488	1.2618	0.00939465
ENSG00000112685	EXOC2	-0.232896	0.850925	0.00947021
ENSG00000035928	RFC1	-0.27785	0.824819	0.00947021
ENSG00000213079	SCAF8	-0.324511	0.798569	0.00947021
ENSG00000176623	RMDN1	0.3409	1.26655	0.00949336
ENSG00000166902	MRPL16	0.213216	1.15927	0.00951898
ENSG00000107902	LHPP	0.400817	1.32026	0.00967446
ENSG00000167985	SDHAF2	0.212163	1.15842	0.00967446
ENSG00000186522	SEPTIN10	0.192655	1.14286	0.00967446
ENSG00000164758	MED30	0.415354	1.33363	0.00978076
ENSG00000162928	PEX13	0.273057	1.20837	0.00982235
ENSG00000104979	C19orf53	0.219747	1.16453	0.00982235
ENSG00000102316	MAGED2	0.203218	1.15126	0.00982235
ENSG00000145335	SNCA	-0.953945	0.516219	0.00982235
ENSG00000109814	UGDH	-0.261687	0.834112	0.00985164
ENSG00000146433	TMEM181	-0.263977	0.832789	0.00988681
ENSG00000177879	AP3S1	0.276653	1.21138	0.0099232
ENSG00000115641	FHL2	0.148283	1.10825	0.0099232
ENSG00000187840	EIF4EBP1	0.203766	1.1517	0.00997113
ENSG00000110200	ANAPC15	0.246615	1.18642	0.010073
ENSG00000146674	IGFBP3	0.248897	1.1883	0.0101059
ENSG00000127990	SGCE	0.513187	1.4272	0.010167
ENSG00000178741	COX5A	0.240914	1.18174	0.0102167
ENSG00000163902	RPN1	0.220418	1.16507	0.0102487
ENSG00000134905	CARS2	0.249156	1.18851	0.0102949
ENSG00000162704	ARPC5	0.247957	1.18752	0.0105474
ENSG00000168275	COA6	0.334263	1.26073	0.0106743
ENSG00000100558	PLEK2	0.313393	1.24263	0.0107351
ENSG00000197183	NOL4L	0.351933	1.27627	0.0108225
ENSG00000214026	MRPL23	0.199604	1.14838	0.0109267
ENSG00000107130	NCS1	0.217807	1.16296	0.010971
ENSG00000204138	PHACTR4	-0.366032	0.775913	0.01101
ENSG00000084764	MAPRE3	0.4425	1.35896	0.0110149
ENSG00000101577	LPIN2	-0.27948	0.823888	0.0110149
ENSG00000117523	PRRC2C	-0.282619	0.822097	0.0110149
ENSG00000134970	TMED7	0.196829	1.14618	0.0111676
ENSG00000177917	ARL6IP6	0.263043	1.20001	0.0112969
ENSG00000185818	NAT8L	0.937316	1.91496	0.0113346
ENSG00000104856	RELB	0.318217	1.24679	0.0113625
ENSG00000004487	KDM1A	-0.210321	0.864345	0.0113685
ENSG00000182774	RPS17	0.233636	1.17579	0.0114005
ENSG00000110497	AMBRA1	-0.393879	0.76108	0.011413
ENSG00000220842	RPL21P16	0.614738	1.53128	0.0114498
ENSG00000257524	AL157935.2	0.900498	1.86671	0.0115947
ENSG00000083845	RPS5	0.312491	1.24185	0.0115947
ENSG00000006576	PHTF2	0.326975	1.25438	0.0116095
ENSG00000138835	RGS3	0.215362	1.161	0.0117248
ENSG00000196843	ARID5A	0.361911	1.28513	0.0117365
ENSG00000171421	MRPL36	0.274145	1.20928	0.0117365
ENSG00000162076	FLYWCH2	0.265542	1.20209	0.0117476
ENSG00000130300	PLVAP	-0.539768	0.687881	0.0117476
ENSG00000119917	IFIT3	0.341878	1.26741	0.0117478
ENSG00000151474	FRMD4A	0.326822	1.25425	0.0117478
ENSG00000163444	TMEM183A	0.230659	1.17337	0.0117478
ENSG00000143797	MBOAT2	0.31294	1.24224	0.0118247
ENSG00000119402	FBXW2	-0.18379	0.880387	0.0118774
ENSG00000173486	FKBP2	0.295375	1.2272	0.0118793
ENSG00000136521	NDUFB5	0.283336	1.21701	0.0119154
ENSG00000102030	NAA10	0.203178	1.15123	0.0119154
ENSG00000184260	H2AC20	0.274189	1.20931	0.0119204
ENSG00000115520	COQ10B	0.265596	1.20213	0.0119204
ENSG00000176435	CLEC14A	-0.297973	0.813394	0.0119204
ENSG00000263001	GTF2I	-0.235413	0.849442	0.0119301
ENSG00000250241	AC105383.1	-3.40206	0.0945974	0.0119916
ENSG00000165246	NLGN4Y	0.415809	1.33405	0.012068
ENSG00000137309	HMGA1	-0.25006	0.840861	0.0122076
ENSG00000173846	PLK3	-0.319615	0.801284	0.0122079
ENSG00000196549	MME	-0.393264	0.761405	0.0122079
ENSG00000119787	ATL2	0.233313	1.17553	0.0122476
ENSG00000066735	KIF26A	0.493756	1.40811	0.0123128
ENSG00000130881	LRP3	0.38941	1.30986	0.0123128
ENSG00000169627	BOLA2B	0.309854	1.23958	0.0123128
ENSG00000140264	SERF2	0.24172	1.1824	0.0123128
ENSG00000108479	GALK1	0.198422	1.14744	0.0123128
ENSG00000130731	METTL26	0.162747	1.11942	0.0123128
ENSG00000198682	PAPSS2	-0.181751	0.881632	0.0123128
ENSG00000011405	PIK3C2A	-0.237698	0.848097	0.0123128
ENSG00000215301	DDX3X	-0.279578	0.823832	0.0123128
ENSG00000117724	CENPF	-0.29022	0.817777	0.0123128
ENSG00000101849	TBL1X	-0.290274	0.817747	0.0123128
ENSG00000159200	RCAN1	-0.381018	0.767896	0.0123128
ENSG00000054277	OPN3	-0.574962	0.671304	0.0123128
ENSG00000189060	H1-0	0.209523	1.15631	0.0123171
ENSG00000198356	GET3	0.205278	1.15291	0.0124904
ENSG00000146267	FAXC	0.672112	1.5934	0.0125122
ENSG00000141385	AFG3L2	-0.307064	0.808285	0.0125122
ENSG00000138069	RAB1A	0.238646	1.17988	0.0125513
ENSG00000115307	AUP1	0.188128	1.13928	0.0126141
ENSG00000136888	ATP6V1G1	0.245319	1.18535	0.0126608
ENSG00000131508	UBE2D2	0.177091	1.1306	0.0126741
ENSG00000189079	ARID2	-0.339279	0.790436	0.0127598
ENSG00000222328	RNU2-2P	0.617437	1.53415	0.0128542
ENSG00000100612	DHRS7	0.371574	1.29376	0.0128542
ENSG00000175938	ORAI3	0.3573	1.28103	0.0128542
ENSG00000284194	SCO2	0.320905	1.24911	0.0128542
ENSG00000136986	DERL1	0.305652	1.23598	0.0128542
ENSG00000171169	NAIF1	0.32862	1.25581	0.0128908
ENSG00000091947	TMEM101	0.239419	1.18052	0.0129769
ENSG00000204304	PBX2	-0.263232	0.833219	0.0131244
ENSG00000174886	NDUFA11	0.275266	1.21022	0.0131824
ENSG00000198843	SELENOT	0.267078	1.20337	0.0131824
ENSG00000139117	CPNE8	0.6716	1.59284	0.0131999
ENSG00000178445	GLDC	0.374829	1.29669	0.0131999
ENSG00000149273	RPS3	0.307395	1.23747	0.0131999
ENSG00000112541	PDE10A	-0.255042	0.837963	0.0131999
ENSG00000125611	CHCHD5	0.348954	1.27364	0.0132334
ENSG00000165475	CRYL1	0.308983	1.23883	0.0132648
ENSG00000182752	PAPPA	-0.297265	0.813794	0.0133089
ENSG00000180229	HERC2P3	-0.432278	0.74109	0.0133184
ENSG00000177830	CHID1	0.187414	1.13872	0.013361
ENSG00000179091	CYC1	0.250053	1.18925	0.0134045
ENSG00000125648	SLC25A23	0.34006	1.26581	0.0134229
ENSG00000197971	MBP	-0.259622	0.835307	0.0135654
ENSG00000147592	LACTB2	0.397098	1.31686	0.0136398
ENSG00000120526	NUDCD1	0.265242	1.20184	0.0136398
ENSG00000125901	MRPS26	0.224557	1.16842	0.0136398
ENSG00000074696	HACD3	0.219674	1.16447	0.0136905
ENSG00000075223	SEMA3C	-0.310736	0.80623	0.0137355
ENSG00000187522	HSPA14	0.409244	1.32799	0.0137355
ENSG00000135048	CEMIP2	-0.277623	0.824949	0.0137656
ENSG00000131507	NDFIP1	0.218868	1.16382	0.0138007
ENSG00000123240	OPTN	0.224872	1.16867	0.0138975
ENSG00000135441	BLOC1S1	0.220205	1.1649	0.0138975
ENSG00000213523	SRA1	0.214839	1.16057	0.0138975
ENSG00000131966	ACTR10	0.344395	1.26962	0.0139484
ENSG00000142937	RPS8	0.202287	1.15052	0.0139484
ENSG00000169599	NFU1	0.293302	1.22544	0.0139524
ENSG00000181029	TRAPPC5	0.225217	1.16895	0.0139679
ENSG00000241553	ARPC4	0.215027	1.16073	0.0139679
ENSG00000093010	COMT	0.193445	1.14349	0.0139679
ENSG00000147394	ZNF185	-0.198928	0.871198	0.0139679
ENSG00000010322	NISCH	-0.237353	0.848301	0.0139679
ENSG00000141556	TBCD	0.194578	1.14439	0.013974
ENSG00000181222	POLR2A	-0.318717	0.801782	0.014022
ENSG00000181555	SETD2	-0.303177	0.810466	0.0140374
ENSG00000184232	OAF	0.328382	1.2556	0.0140482
ENSG00000169241	SLC50A1	0.249803	1.18904	0.0140955
ENSG00000170085	SIMC1	0.389032	1.30951	0.0141109
ENSG00000113389	NPR3	-0.889928	0.539641	0.0141418
ENSG00000198732	SMOC1	0.422146	1.33992	0.0141749
ENSG00000086619	ERO1B	0.524411	1.43835	0.0142001
ENSG00000108691	CCL2	0.379854	1.30121	0.0142001
ENSG00000268043	NBPF12	-0.518992	0.697859	0.0142001
ENSG00000206597	SNORA57	0.435113	1.35202	0.014205
ENSG00000135318	NT5E	-0.156731	0.897056	0.014205
ENSG00000006118	TMEM132A	0.430936	1.34811	0.0142159
ENSG00000185627	PSMD13	0.281535	1.21549	0.0142178
ENSG00000111186	WNT5B	-0.232011	0.851447	0.014235
ENSG00000114520	SNX4	0.317804	1.24643	0.0142587
ENSG00000173171	MTX1	0.178688	1.13185	0.0143822
ENSG00000109436	TBC1D9	-0.23143	0.85179	0.0143822
ENSG00000103111	MON1B	-0.298458	0.813121	0.0143822
ENSG00000054983	GALC	-0.442559	0.735828	0.0143822
ENSG00000079459	FDFT1	0.226374	1.16989	0.0144004
ENSG00000063660	GPC1	0.564513	1.47889	0.0144286
ENSG00000100478	AP4S1	0.358558	1.28214	0.0144286
ENSG00000049541	RFC2	0.179629	1.13259	0.0144363
ENSG00000106511	MEOX2	-0.558708	0.67891	0.0144363
ENSG00000216490	IFI30	0.534025	1.44796	0.0144886
ENSG00000286019	NOTCH2NLB	0.259534	1.19709	0.0144886
ENSG00000168291	PDHB	0.216218	1.16168	0.0144886
ENSG00000120063	GNA13	-0.170548	0.888505	0.0144886
ENSG00000103194	USP10	-0.224596	0.855835	0.0144886
ENSG00000174238	PITPNA	-0.412832	0.751147	0.0144886
ENSG00000164039	BDH2	-0.667528	0.629585	0.0144886
ENSG00000175745	NR2F1	0.344869	1.27004	0.014494
ENSG00000100319	ZMAT5	0.263543	1.20042	0.014494
ENSG00000184164	CRELD2	0.209014	1.1559	0.0144965
ENSG00000159433	STARD9	-0.339553	0.790286	0.0145157
ENSG00000128626	MRPS12	0.227213	1.17057	0.0145475
ENSG00000198677	TTC37	-0.39022	0.763013	0.0146106
ENSG00000204628	RACK1	0.206767	1.1541	0.0147504
ENSG00000034713	GABARAPL2	0.257273	1.19522	0.0147548
ENSG00000204590	GNL1	-0.240799	0.846276	0.0147548
ENSG00000092201	SUPT16H	-0.219773	0.8587	0.0147783
ENSG00000243449	C4orf48	0.329178	1.2563	0.0149581
ENSG00000165264	NDUFB6	0.298603	1.22995	0.0149581
ENSG00000214078	CPNE1	0.163045	1.11965	0.0149702
ENSG00000174748	RPL15	0.233273	1.1755	0.0149922
ENSG00000165948	IFI27L1	0.304659	1.23513	0.0150714
ENSG00000111962	UST	0.49257	1.40695	0.0151145
ENSG00000047634	SCML1	0.461739	1.3772	0.0151145
ENSG00000149541	B3GAT3	0.289127	1.2219	0.0151145
ENSG00000135617	PRADC1	0.265787	1.20229	0.0151145
ENSG00000121022	COPS5	0.199005	1.14791	0.0151145
ENSG00000119682	AREL1	-0.25804	0.836223	0.0151145
ENSG00000169992	NLGN2	-0.397764	0.759034	0.0151145
ENSG00000288473	AL669830.2	-2.30588	0.202237	0.0151145
ENSG00000166532	RIMKLB	-0.335433	0.792546	0.0152559
ENSG00000164236	ANKRD33B	-0.241321	0.84597	0.0153004
ENSG00000171858	RPS21	0.277991	1.21251	0.0153181
ENSG00000105696	TMEM59L	0.779469	1.7165	0.0154293
ENSG00000114302	PRKAR2A	-0.154625	0.898366	0.0154566
ENSG00000165959	CLMN	0.551556	1.46567	0.0155074
ENSG00000170955	CAVIN3	0.182679	1.13499	0.0155074
ENSG00000065057	NTHL1	0.266596	1.20297	0.0155975
ENSG00000171792	RHNO1	-0.225543	0.855273	0.0156496
ENSG00000128394	APOBEC3F	0.468577	1.38374	0.0156511
ENSG00000170919	TPT1-AS1	-0.406337	0.754537	0.0156532
ENSG00000143543	JTB	0.16045	1.11764	0.0157835
ENSG00000259001	AL355075.4	0.385483	1.3063	0.0158609
ENSG00000123131	PRDX4	0.284063	1.21762	0.0158609
ENSG00000174718	RESF1	-0.615103	0.652883	0.0159107
ENSG00000075142	SRI	0.243374	1.18376	0.0159229
ENSG00000006831	ADIPOR2	-0.292272	0.816615	0.0159229
ENSG00000132793	LPIN3	0.469084	1.38423	0.0159321
ENSG00000166923	GREM1	-0.248573	0.841729	0.0159321
ENSG00000138814	PPP3CA	-0.239859	0.846828	0.0160311
ENSG00000137463	MGARP	0.310309	1.23997	0.0160959
ENSG00000167468	GPX4	0.17947	1.13247	0.0160959
ENSG00000065427	KARS1	-0.208881	0.865208	0.0160959
ENSG00000163605	PPP4R2	-0.268726	0.830052	0.0160959
ENSG00000120725	SIL1	0.262482	1.19954	0.0162762
ENSG00000189129	PLAC9	0.433517	1.35052	0.0163712
ENSG00000179632	MAF1	0.163967	1.12036	0.0163712
ENSG00000101294	HM13	0.164574	1.12084	0.0163805
ENSG00000171681	ATF7IP	-0.270315	0.829138	0.0163805
ENSG00000119285	HEATR1	-0.394513	0.760746	0.0165232
ENSG00000166326	TRIM44	-0.289179	0.818368	0.016632
ENSG00000165733	BMS1	-0.274843	0.82654	0.0167212
ENSG00000135040	NAA35	0.2451	1.18517	0.0167357
ENSG00000198860	TSEN15	0.258416	1.19616	0.0168383
ENSG00000169750	RAC3	0.21209	1.15836	0.0168383
ENSG00000134444	RELCH	-0.277412	0.82507	0.0168383
ENSG00000168137	SETD5	-0.319178	0.801526	0.0169937
ENSG00000214530	STARD10	0.310713	1.24032	0.0171718
ENSG00000254681	PKD1P5	-0.571918	0.672722	0.0171718
ENSG00000109846	CRYAB	0.336679	1.26285	0.0171933
ENSG00000151458	ANKRD50	-0.300427	0.812012	0.0171933
ENSG00000070761	CFAP20	0.260102	1.19756	0.0173101
ENSG00000176463	SLCO3A1	0.576851	1.49159	0.0173518
ENSG00000181264	TLCD5	0.374436	1.29633	0.0173562
ENSG00000124380	SNRNP27	0.271186	1.2068	0.0173562
ENSG00000089876	DHX32	0.245171	1.18523	0.0173562
ENSG00000176624	MEX3C	-0.266266	0.831469	0.0174527
ENSG00000165476	REEP3	0.134291	1.09755	0.0175077
ENSG00000203805	PLPP4	0.443166	1.35958	0.0175845
ENSG00000101474	APMAP	0.129136	1.09364	0.0175845
ENSG00000198937	CCDC167	0.306467	1.23668	0.0176193
ENSG00000172380	GNG12	-0.298085	0.813331	0.0176193
ENSG00000135842	NIBAN1	0.334735	1.26115	0.0179121
ENSG00000115286	NDUFS7	0.19774	1.1469	0.0179121
ENSG00000165271	NOL6	-0.246372	0.843014	0.0180212
ENSG00000115204	MPV17	0.194757	1.14453	0.01806
ENSG00000067646	ZFY	0.418529	1.33656	0.0182693
ENSG00000064607	SUGP2	-0.207017	0.866326	0.0182693
ENSG00000128266	GNAZ	0.503506	1.41765	0.0183417
ENSG00000161513	FDXR	0.205081	1.15275	0.0183417
ENSG00000001629	ANKIB1	-0.288624	0.818682	0.0183417
ENSG00000178607	ERN1	-0.518324	0.698182	0.0183417
ENSG00000147155	EBP	0.243314	1.18371	0.0183439
ENSG00000140948	ZCCHC14	-0.357859	0.780322	0.0184177
ENSG00000004534	RBM6	-0.270461	0.829055	0.0184934
ENSG00000130584	ZBTB46	0.715379	1.64191	0.018569
ENSG00000076351	SLC46A1	0.559488	1.47375	0.0186028
ENSG00000125970	RALY	0.188892	1.13989	0.0186535
ENSG00000100138	SNU13	0.251237	1.19023	0.0186796
ENSG00000102699	PARP4	-0.217239	0.86021	0.0186796
ENSG00000183598	H3C13	0.319148	1.24759	0.0187484
ENSG00000144959	NCEH1	0.215909	1.16144	0.0187484
ENSG00000057608	GDI2	0.223639	1.16768	0.018808
ENSG00000267519	AC020916.1	-0.393966	0.761035	0.0188212
ENSG00000081320	STK17B	0.233663	1.17582	0.0188277
ENSG00000134824	FADS2	0.329404	1.25649	0.0188572
ENSG00000172086	KRCC1	0.285571	1.21889	0.0189625
ENSG00000145349	CAMK2D	-0.229999	0.852635	0.0190276
ENSG00000123144	TRIR	0.146035	1.10652	0.0190284
ENSG00000102900	NUP93	-0.223939	0.856225	0.0190394
ENSG00000067992	PDK3	0.746313	1.6775	0.0191189
ENSG00000124614	RPS10	0.26183	1.199	0.0191189
ENSG00000206053	JPT2	0.219639	1.16444	0.0191189
ENSG00000213337	ANKRD39	0.312582	1.24193	0.0191504
ENSG00000125841	NRSN2	0.297651	1.22914	0.0191584
ENSG00000081913	PHLPP1	-0.410943	0.752132	0.0191802
ENSG00000106992	AK1	0.199792	1.14853	0.019314
ENSG00000100092	SH3BP1	0.333019	1.25965	0.01942
ENSG00000214796	TUBAP5	0.879238	1.8394	0.0194852
ENSG00000223496	EXOSC6	-0.155985	0.897519	0.0194852
ENSG00000052802	MSMO1	0.31023	1.23991	0.0194868
ENSG00000161920	MED11	0.300148	1.23127	0.019615
ENSG00000107796	ACTA2	0.481242	1.39594	0.0197139
ENSG00000175606	TMEM70	0.312813	1.24213	0.0197694
ENSG00000087510	TFAP2C	0.551185	1.46529	0.0198131
ENSG00000106367	AP1S1	0.184329	1.13629	0.0198131
ENSG00000003056	M6PR	-0.165205	0.891802	0.0198131
ENSG00000166439	RNF169	-0.216576	0.860606	0.0200297
ENSG00000017483	SLC38A5	-1.22434	0.427993	0.0200902
ENSG00000105953	OGDH	-0.180793	0.882218	0.0201284
ENSG00000115163	CENPA	0.213559	1.15954	0.0201407
ENSG00000185904	LINC00839	0.387085	1.30775	0.020145
ENSG00000169118	CSNK1G1	-0.267599	0.830701	0.0202593
ENSG00000135622	SEMA4F	0.292871	1.22508	0.0202904
ENSG00000124788	ATXN1	-0.360683	0.778796	0.0202907
ENSG00000100003	SEC14L2	0.211832	1.15816	0.0204235
ENSG00000135541	AHI1	-0.480003	0.716976	0.0204235
ENSG00000180228	PRKRA	0.203093	1.15116	0.0204995
ENSG00000125821	DTD1	0.209308	1.15613	0.0205228
ENSG00000107874	CUEDC2	0.207867	1.15498	0.0205268
ENSG00000260035	AC051619.7	-0.876207	0.544798	0.0206096
ENSG00000034053	APBA2	0.324562	1.25228	0.0206402
ENSG00000171863	RPS7	0.361253	1.28454	0.0207392
ENSG00000162976	SLC66A3	0.317413	1.24609	0.0207392
ENSG00000156463	SH3RF2	0.348593	1.27332	0.0207968
ENSG00000168781	PPIP5K1	-0.39313	0.761476	0.0209635
ENSG00000164096	C4orf3	0.211708	1.15806	0.0210176
ENSG00000138759	FRAS1	-2.11511	0.230828	0.0210176
ENSG00000163001	CFAP36	0.274971	1.20997	0.0211027
ENSG00000157833	GAREM2	0.953958	1.93718	0.0211906
ENSG00000176946	THAP4	0.167955	1.12347	0.0212652
ENSG00000118762	PKD2	-0.456223	0.728892	0.0213625
ENSG00000165752	STK32C	0.292844	1.22505	0.0214049
ENSG00000165501	LRR1	0.284288	1.21781	0.0214049
ENSG00000260027	HOXB7	0.234496	1.1765	0.0214049
ENSG00000105664	COMP	-1.93721	0.261121	0.0214049
ENSG00000023041	ZDHHC6	0.206067	1.15354	0.0217893
ENSG00000149485	FADS1	0.242076	1.18269	0.0218168
ENSG00000130764	LRRC47	-0.182747	0.881024	0.0218168
ENSG00000103365	GGA2	-0.200329	0.870352	0.0218168
ENSG00000204822	MRPL53	0.266383	1.20279	0.0218766
ENSG00000188186	LAMTOR4	0.219968	1.16471	0.0219308
ENSG00000135829	DHX9	-0.329101	0.796032	0.0220725
ENSG00000171813	PWWP2B	0.448606	1.36472	0.0221096
ENSG00000186654	PRR5	0.597246	1.51283	0.0222255
ENSG00000103260	METRN	0.228637	1.17173	0.0222434
ENSG00000177383	MAGEF1	0.272134	1.20759	0.0223421
ENSG00000162599	NFIA	-0.280432	0.823345	0.02245
ENSG00000167123	CERCAM	0.1992	1.14806	0.0226279
ENSG00000105879	CBLL1	-0.489508	0.712268	0.0227239
ENSG00000175274	TP53I11	0.44571	1.36198	0.0227273
ENSG00000188343	CIBAR1	0.284744	1.21819	0.0227486
ENSG00000108091	CCDC6	-0.226487	0.854714	0.0227486
ENSG00000127463	EMC1	-0.18445	0.879985	0.0228655
ENSG00000217930	PAM16	0.249795	1.18904	0.0229155
ENSG00000155592	ZKSCAN2	-0.448449	0.73283	0.0229617
ENSG00000280071	GATD3B	0.15897	1.11649	0.0230181
ENSG00000120899	PTK2B	-0.347667	0.785854	0.0230181
ENSG00000132604	TERF2	-0.315638	0.803495	0.0231749
ENSG00000100711	ZFYVE21	0.180207	1.13305	0.02336
ENSG00000215386	MIR99AHG	-0.49135	0.711359	0.0233629
ENSG00000142945	KIF2C	-0.210662	0.86414	0.0233788
ENSG00000165996	HACD1	0.299549	1.23076	0.0236011
ENSG00000225190	PLEKHM1	-0.248456	0.841797	0.0236011
ENSG00000169641	LUZP1	-0.172162	0.887511	0.0236097
ENSG00000175550	DRAP1	0.157729	1.11553	0.0236365
ENSG00000140943	MBTPS1	-0.192989	0.874791	0.0236641
ENSG00000164574	GALNT10	-0.217399	0.860115	0.0236641
ENSG00000172586	CHCHD1	0.253824	1.19236	0.0238173
ENSG00000063854	HAGH	0.221313	1.16579	0.0238173
ENSG00000106546	AHR	-0.217703	0.859934	0.0238173
ENSG00000136709	WDR33	-0.22861	0.853457	0.0238173
ENSG00000155016	CYP2U1	-0.397769	0.759031	0.0238173
ENSG00000114439	BBX	-0.248015	0.842054	0.0238202
ENSG00000185386	MAPK11	0.269577	1.20545	0.0239136
ENSG00000178726	THBD	-0.231932	0.851494	0.0239136
ENSG00000076201	PTPN23	-0.404883	0.755297	0.0239136
ENSG00000268350	FAM156A	-0.624209	0.648775	0.0239136
ENSG00000159403	C1R	0.581064	1.49595	0.0240247
ENSG00000020256	ZFP64	0.276251	1.21104	0.0240495
ENSG00000269893	SNHG8	0.299905	1.23106	0.0240734
ENSG00000106263	EIF3B	-0.202596	0.868986	0.024113
ENSG00000113013	HSPA9	0.160788	1.1179	0.0243788
ENSG00000107679	PLEKHA1	0.159898	1.11721	0.024526
ENSG00000239264	TXNDC5	-0.156754	0.897041	0.0245488
ENSG00000123810	B9D2	0.369444	1.29186	0.0245518
ENSG00000005243	COPZ2	0.249976	1.18919	0.0245518
ENSG00000141504	SAT2	0.242592	1.18312	0.0245518
ENSG00000197019	SERTAD1	0.21879	1.16376	0.0245518
ENSG00000143774	GUK1	0.161639	1.11856	0.0245518
ENSG00000003393	ALS2	-0.335905	0.792287	0.0245518
ENSG00000115295	CLIP4	0.281972	1.21586	0.0245977
ENSG00000100889	PCK2	0.204093	1.15196	0.0246752
ENSG00000112242	E2F3	-0.275518	0.826153	0.0247096
ENSG00000008988	RPS20	0.280217	1.21438	0.0247342
ENSG00000150768	DLAT	0.180637	1.13338	0.0247578
ENSG00000145050	MANF	0.3088	1.23868	0.0249396
ENSG00000197323	TRIM33	-0.303861	0.810082	0.0250427
ENSG00000108510	MED13	-0.348592	0.78535	0.0251272
ENSG00000269900	RMRP	0.318498	1.24703	0.0252391
ENSG00000174106	LEMD3	-0.266586	0.831284	0.0252627
ENSG00000175352	NRIP3	0.210928	1.15743	0.025277
ENSG00000172575	RASGRP1	-0.831206	0.562059	0.025277
ENSG00000179776	CDH5	-0.28526	0.820594	0.0252819
ENSG00000074319	TSG101	0.273356	1.20862	0.025355
ENSG00000257556	LINC02298	1.43681	2.70721	0.0255538
ENSG00000185591	SP1	-0.172712	0.887174	0.0255545
ENSG00000188033	ZNF490	-0.423215	0.745761	0.0255545
ENSG00000158710	TAGLN2	0.158482	1.11611	0.0255622
ENSG00000153179	RASSF3	-0.226088	0.85495	0.0255622
ENSG00000204256	BRD2	-0.227109	0.854345	0.0255622
ENSG00000070961	ATP2B1	-0.658066	0.633727	0.0255622
ENSG00000103353	UBFD1	-0.211315	0.86375	0.0255683
ENSG00000069275	NUCKS1	-0.270757	0.828885	0.0255683
ENSG00000135070	ISCA1	0.250934	1.18998	0.025796
ENSG00000138092	CENPO	0.168546	1.12392	0.0257989
ENSG00000105726	ATP13A1	-0.247657	0.842263	0.0257989
ENSG00000142168	SOD1	0.233124	1.17538	0.0258364
ENSG00000164659	ELAPOR2	-0.507524	0.703429	0.0258754
ENSG00000166797	CIAO2A	0.251131	1.19014	0.0259476
ENSG00000125877	ITPA	0.200935	1.14944	0.0261037
ENSG00000197746	PSAP	0.193589	1.14361	0.0263873
ENSG00000143727	ACP1	0.221142	1.16566	0.0264572
ENSG00000134690	CDCA8	-0.151785	0.900136	0.0264796
ENSG00000197496	SLC2A10	0.616105	1.53273	0.0265606
ENSG00000140990	NDUFB10	0.176781	1.13036	0.0265606
ENSG00000006744	ELAC2	-0.177507	0.88423	0.0265914
ENSG00000109906	ZBTB16	0.235739	1.17751	0.026644
ENSG00000123983	ACSL3	0.215358	1.16099	0.026644
ENSG00000143127	ITGA10	-0.387537	0.764434	0.026644
ENSG00000187601	MAGEH1	0.290427	1.223	0.0267087
ENSG00000179958	DCTPP1	0.218942	1.16388	0.0267087
ENSG00000107672	NSMCE4A	0.196923	1.14625	0.0267087
ENSG00000164898	FMC1	0.402247	1.32156	0.0270625
ENSG00000125863	MKKS	0.277315	1.21194	0.0270658
ENSG00000089685	BIRC5	0.269303	1.20523	0.0271096
ENSG00000075975	MKRN2	-0.244822	0.84392	0.027196
ENSG00000143369	ECM1	0.281886	1.21578	0.0272511
ENSG00000156795	NTAQ1	0.503795	1.41794	0.0272538
ENSG00000182831	C16orf72	-0.168833	0.889562	0.0273143
ENSG00000128951	DUT	0.201138	1.1496	0.0273214
ENSG00000156110	ADK	0.244719	1.18486	0.0273991
ENSG00000108854	SMURF2	-0.237601	0.848154	0.0273991
ENSG00000101752	MIB1	-0.232351	0.851247	0.0275257
ENSG00000172939	OXSR1	-0.169534	0.88913	0.0278027
ENSG00000157168	NRG1	0.508026	1.4221	0.0278249
ENSG00000148572	NRBF2	0.221687	1.1661	0.0278249
ENSG00000167965	MLST8	0.230413	1.17317	0.0279289
ENSG00000134955	SLC37A2	0.325415	1.25302	0.0280396
ENSG00000078269	SYNJ2	-0.156692	0.89708	0.0280396
ENSG00000122882	ECD	0.228379	1.17152	0.0280773
ENSG00000099203	TMED1	0.182165	1.13458	0.0281165
ENSG00000153250	RBMS1	-0.227832	0.853917	0.028155
ENSG00000157077	ZFYVE9	-0.244328	0.844209	0.0281654
ENSG00000219481	NBPF1	-0.356995	0.780789	0.0281953
ENSG00000124444	ZNF576	0.290383	1.22297	0.0283454
ENSG00000143155	TIPRL	0.248793	1.18821	0.0283454
ENSG00000168917	SLC35G2	0.317401	1.24608	0.0286604
ENSG00000151366	NDUFC2	0.200894	1.14941	0.0286604
ENSG00000143549	TPM3	0.189367	1.14026	0.0287119
ENSG00000154473	BUB3	0.197616	1.1468	0.0288712
ENSG00000171943	SRGAP2C	-0.21613	0.860872	0.0288949
ENSG00000182551	ADI1	0.200405	1.14902	0.0289183
ENSG00000111261	MANSC1	-0.393926	0.761056	0.0289599
ENSG00000164347	GFM2	0.253395	1.19201	0.0290582
ENSG00000167996	FTH1	0.24917	1.18852	0.0290582
ENSG00000174915	PTDSS2	0.17064	1.12556	0.0290582
ENSG00000121716	PILRB	-0.397513	0.759166	0.0290582
ENSG00000188786	MTF1	-0.399437	0.758154	0.0290582
ENSG00000276216	AC245014.3	-0.867983	0.547912	0.0290582
ENSG00000135778	NTPCR	0.336554	1.26274	0.0290726
ENSG00000119979	DENND10	0.171181	1.12598	0.0290813
ENSG00000160007	ARHGAP35	-0.227536	0.854092	0.029085
ENSG00000185483	ROR1	-0.223087	0.85673	0.0293149
ENSG00000111670	GNPTAB	-0.250521	0.840593	0.0293373
ENSG00000119326	CTNNAL1	0.234605	1.17658	0.0295845
ENSG00000112118	MCM3	-0.187582	0.878076	0.0297567
ENSG00000121644	DESI2	0.175026	1.12898	0.0298461
ENSG00000150990	DHX37	-0.240898	0.846219	0.0298461
ENSG00000051341	POLQ	-0.409602	0.752831	0.029875
ENSG00000013573	DDX11	-0.282872	0.821953	0.0299817
ENSG00000099617	EFNA2	1.64346	3.12415	0.0300903
ENSG00000164638	SLC29A4	0.541607	1.45559	0.0301328
ENSG00000163541	SUCLG1	0.259183	1.1968	0.0301329
ENSG00000114978	MOB1A	0.16957	1.12472	0.0301329
ENSG00000062725	APPBP2	-0.335746	0.792374	0.0301435
ENSG00000203705	TATDN3	0.354249	1.27832	0.0302368
ENSG00000008869	HEATR5B	-0.305816	0.808985	0.0302368
ENSG00000178752	ERFE	0.373817	1.29578	0.0303523
ENSG00000135968	GCC2	-0.347414	0.785992	0.0304945
ENSG00000115109	EPB41L5	0.312005	1.24143	0.0305035
ENSG00000163882	POLR2H	0.242383	1.18294	0.0305035
ENSG00000088298	EDEM2	0.189913	1.14069	0.0305035
ENSG00000136279	DBNL	0.156911	1.1149	0.0305035
ENSG00000071242	RPS6KA2	-0.269686	0.8295	0.0305035
ENSG00000171159	C9orf16	0.209375	1.15619	0.0305071
ENSG00000125977	EIF2S2	0.230691	1.1734	0.0307902
ENSG00000138674	SEC31A	-0.194053	0.874146	0.0307912
ENSG00000065717	TLE2	0.38078	1.30205	0.0307965
ENSG00000171345	KRT19	-1.14895	0.450955	0.0308605
ENSG00000057294	PKP2	-0.308671	0.807385	0.0308823
ENSG00000118260	CREB1	-0.336899	0.791741	0.0308823
ENSG00000145494	NDUFS6	0.164332	1.12065	0.0309735
ENSG00000058668	ATP2B4	-0.197902	0.871818	0.0311296
ENSG00000115464	USP34	-0.330297	0.795373	0.0311296
ENSG00000112624	BICRAL	-0.507625	0.703379	0.0312057
ENSG00000011007	ELOA	-0.128686	0.914664	0.0312385
ENSG00000122861	PLAU	0.186134	1.13771	0.0312927
ENSG00000076650	GPATCH1	-0.370035	0.773764	0.0313948
ENSG00000119421	NDUFA8	0.194834	1.14459	0.0314257
ENSG00000149806	FAU	0.170132	1.12516	0.0316197
ENSG00000232434	AJM1	0.464927	1.38025	0.0317218
ENSG00000134440	NARS1	-0.200893	0.870012	0.0317708
ENSG00000102879	CORO1A	0.513553	1.42756	0.0317939
ENSG00000144224	UBXN4	0.181881	1.13436	0.0317939
ENSG00000149187	CELF1	-0.186097	0.87898	0.0317939
ENSG00000117152	RGS4	-0.406311	0.75455	0.031806
ENSG00000185420	SMYD3	0.2965	1.22816	0.0318613
ENSG00000169738	DCXR	0.190334	1.14103	0.0318613
ENSG00000105619	TFPT	0.205057	1.15273	0.0319131
ENSG00000170801	HTRA3	0.478399	1.3932	0.0320033
ENSG00000139793	MBNL2	-0.21914	0.859077	0.0320472
ENSG00000185163	DDX51	-0.291954	0.816795	0.0320476
ENSG00000033050	ABCF2	-0.200918	0.869997	0.0320704
ENSG00000173611	SCAI	0.409541	1.32826	0.0322479
ENSG00000129128	SPCS3	0.2429	1.18337	0.0322479
ENSG00000117691	NENF	0.230904	1.17357	0.0322585
ENSG00000262919	CCNQ	0.219038	1.16396	0.0322627
ENSG00000079337	RAPGEF3	-0.507343	0.703517	0.0323935
ENSG00000253719	ATXN7L3B	-0.201004	0.869945	0.0327869
ENSG00000165516	KLHDC2	0.271728	1.20725	0.0328344
ENSG00000103226	NOMO3	-0.391688	0.762237	0.0328344
ENSG00000067334	DNTTIP2	-0.370356	0.773592	0.0328427
ENSG00000170638	TRABD	0.226236	1.16978	0.0329277
ENSG00000127329	PTPRB	-0.398488	0.758653	0.0329325
ENSG00000145911	N4BP3	0.465604	1.3809	0.032945
ENSG00000169609	C15orf40	0.257101	1.19507	0.0329649
ENSG00000162086	ZNF75A	-0.335914	0.792282	0.033012
ENSG00000277972	CISD3	0.297172	1.22873	0.0330207
ENSG00000122971	ACADS	0.234745	1.1767	0.0330207
ENSG00000179271	GADD45GIP1	0.193967	1.1439	0.0330354
ENSG00000134644	PUM1	-0.254961	0.83801	0.0330571
ENSG00000120697	ALG5	0.265243	1.20184	0.0334492
ENSG00000165092	ALDH1A1	-0.710907	0.610936	0.0334492
ENSG00000058056	USP13	-0.299886	0.812317	0.0336095
ENSG00000071537	SEL1L	0.203455	1.15145	0.0336327
ENSG00000100027	YPEL1	0.588096	1.50326	0.0336451
ENSG00000131845	ZNF304	-0.342487	0.78868	0.0336718
ENSG00000149743	TRPT1	0.268419	1.20449	0.0338665
ENSG00000213614	HEXA	0.242109	1.18272	0.0339826
ENSG00000153310	CYRIB	0.265657	1.20218	0.0340812
ENSG00000028137	TNFRSF1B	-0.248826	0.841581	0.0341733
ENSG00000141646	SMAD4	-0.260751	0.834653	0.0341766
ENSG00000168386	FILIP1L	-0.274907	0.826504	0.0342691
ENSG00000110514	MADD	-0.325451	0.798049	0.03434
ENSG00000167641	PPP1R14A	0.574413	1.48907	0.034387
ENSG00000177427	MIEF2	0.292199	1.2245	0.0344247
ENSG00000188554	NBR1	-0.220433	0.858308	0.0344386
ENSG00000171444	MCC	-0.44364	0.735277	0.0345278
ENSG00000285827	AP001267.5	0.638276	1.55647	0.0346762
ENSG00000102218	RP2	0.203521	1.15151	0.0346762
ENSG00000177239	MAN1B1	0.170285	1.12528	0.0346762
ENSG00000104695	PPP2CB	-0.2725	0.827884	0.0346762
ENSG00000130720	FIBCD1	0.557766	1.47199	0.0347659
ENSG00000157450	RNF111	-0.424887	0.744897	0.0347804
ENSG00000283196	LSP1P5	0.198501	1.14751	0.0347963
ENSG00000047249	ATP6V1H	0.309748	1.23949	0.0349357
ENSG00000150787	PTS	0.279616	1.21387	0.0350308
ENSG00000141552	ANAPC11	0.207469	1.15466	0.0350308
ENSG00000169213	RAB3B	-0.172501	0.887303	0.0350713
ENSG00000137075	RNF38	-0.32981	0.795641	0.035181
ENSG00000223953	C1QTNF5	0.220363	1.16503	0.0352098
ENSG00000110047	EHD1	-0.150513	0.90093	0.0352098
ENSG00000170379	TCAF2	-0.322033	0.799942	0.0352098
ENSG00000107719	PALD1	0.32621	1.25372	0.0354064
ENSG00000132635	PCED1A	0.271766	1.20728	0.0354064
ENSG00000106605	BLVRA	0.211452	1.15785	0.0354386
ENSG00000181090	EHMT1	-0.320251	0.80093	0.0354386
ENSG00000155096	AZIN1	0.180903	1.13359	0.035487
ENSG00000037280	FLT4	0.356681	1.28048	0.0354911
ENSG00000167617	CDC42EP5	0.323261	1.25116	0.0355331
ENSG00000181019	NQO1	0.265228	1.20183	0.0355331
ENSG00000119203	CPSF3	0.179414	1.13242	0.0355331
ENSG00000115687	PASK	-0.422845	0.745952	0.0355331
ENSG00000116455	WDR77	-0.18374	0.880417	0.0356272
ENSG00000114023	FAM162A	0.28103	1.21506	0.0357421
ENSG00000154305	MIA3	-0.258234	0.836111	0.0357796
ENSG00000180822	PSMG4	0.234102	1.17617	0.0358087
ENSG00000078596	ITM2A	-0.717129	0.608307	0.0358087
ENSG00000137500	CCDC90B	0.212173	1.15843	0.0358786
ENSG00000102241	HTATSF1	-0.246429	0.842981	0.0359427
ENSG00000105255	FSD1	0.189826	1.14063	0.0359885
ENSG00000099385	BCL7C	0.170861	1.12573	0.0359885
ENSG00000141644	MBD1	-0.252533	0.839421	0.0359885
ENSG00000119004	CYP20A1	0.248685	1.18812	0.0360646
ENSG00000125445	MRPS7	0.22001	1.16474	0.0363947
ENSG00000084207	GSTP1	0.139432	1.10147	0.0364301
ENSG00000198522	GPN1	0.230834	1.17351	0.0365884
ENSG00000244486	SCARF2	0.364409	1.28735	0.0367137
ENSG00000196655	TRAPPC4	0.21945	1.16429	0.0367755
ENSG00000136928	GABBR2	1.17878	2.26386	0.0370697
ENSG00000175203	DCTN2	0.242133	1.18274	0.0371125
ENSG00000165644	COMTD1	0.356247	1.28009	0.0371972
ENSG00000184678	H2BC21	0.283478	1.21713	0.0371972
ENSG00000092036	HAUS4	0.226446	1.16995	0.0371972
ENSG00000091483	FH	0.178694	1.13186	0.0371972
ENSG00000178878	APOLD1	-0.302693	0.810738	0.0371972
ENSG00000127824	TUBA4A	-0.342526	0.788659	0.0371972
ENSG00000198315	ZKSCAN8	-0.402481	0.756556	0.0371972
ENSG00000240053	LY6G5B	-1.43728	0.369263	0.0371972
ENSG00000110330	BIRC2	0.233185	1.17543	0.0372439
ENSG00000105669	COPE	0.168345	1.12377	0.0373253
ENSG00000134245	WNT2B	-0.292709	0.816368	0.0373253
ENSG00000169083	AR	-1.08634	0.470953	0.0373253
ENSG00000082701	GSK3B	-0.190706	0.876177	0.0376957
ENSG00000100564	PIGH	0.283042	1.21676	0.0377663
ENSG00000100288	CHKB	0.297487	1.229	0.0379774
ENSG00000022840	RNF10	-0.194589	0.873822	0.038027
ENSG00000026559	KCNG1	0.433848	1.35083	0.0380497
ENSG00000081026	MAGI3	-0.324707	0.798461	0.0380904
ENSG00000104886	PLEKHJ1	0.178845	1.13198	0.0381053
ENSG00000157181	ODR4	0.409126	1.32788	0.0381077
ENSG00000069849	ATP1B3	0.153741	1.11245	0.0381077
ENSG00000143819	EPHX1	0.244	1.18427	0.0381254
ENSG00000123136	DDX39A	0.203384	1.1514	0.0382686
ENSG00000119333	DYNC2I2	0.153116	1.11197	0.0382686
ENSG00000171488	LRRC8C	-0.387341	0.764538	0.0382686
ENSG00000196150	ZNF250	0.335127	1.26149	0.0382828
ENSG00000183172	SMDT1	0.316487	1.24529	0.0382828
ENSG00000164045	CDC25A	-0.241583	0.845816	0.0384316
ENSG00000151612	ZNF827	-0.330587	0.795213	0.0384702
ENSG00000181472	ZBTB2	-0.248702	0.841653	0.0386829
ENSG00000218336	TENM3	-0.499963	0.707125	0.0388543
ENSG00000131558	EXOC4	-0.332018	0.794425	0.0388889
ENSG00000184270	H2AC21	0.217596	1.16279	0.0388908
ENSG00000181924	COA4	0.184336	1.13629	0.0388908
ENSG00000065534	MYLK	-0.22786	0.853901	0.0388908
ENSG00000086475	SEPHS1	0.157986	1.11573	0.038996
ENSG00000094631	HDAC6	-0.208251	0.865586	0.038996
ENSG00000214548	MEG3	-0.247524	0.842341	0.038996
ENSG00000177602	HASPIN	-0.278201	0.824619	0.0390917
ENSG00000101182	PSMA7	0.229967	1.17281	0.039348
ENSG00000182307	C8orf33	0.161208	1.11822	0.039348
ENSG00000142687	KIAA0319L	-0.29715	0.813858	0.039348
ENSG00000119514	GALNT12	0.484002	1.39862	0.0395115
ENSG00000145247	OCIAD2	-0.537797	0.688822	0.0395115
ENSG00000179085	DPM3	0.292057	1.22438	0.0395864
ENSG00000197747	S100A10	0.163107	1.1197	0.0397349
ENSG00000166526	ZNF3	-0.389977	0.763142	0.0397349
ENSG00000196743	GM2A	0.173359	1.12768	0.039767
ENSG00000171311	EXOSC1	0.232691	1.17502	0.0397809
ENSG00000134686	PHC2	-0.164948	0.891961	0.0397809
ENSG00000143228	NUF2	0.231026	1.17367	0.0400384
ENSG00000134996	OSTF1	0.222255	1.16656	0.0400384
ENSG00000159592	GPBP1L1	-0.211241	0.863794	0.0401383
ENSG00000115266	APC2	1.59286	3.01646	0.0402259
ENSG00000138073	PREB	0.191184	1.1417	0.0402334
ENSG00000111843	TMEM14C	0.232292	1.1747	0.0402777
ENSG00000111716	LDHB	-0.323747	0.798992	0.0405904
ENSG00000203811	H3C14	0.265182	1.20179	0.0406012
ENSG00000122705	CLTA	0.185139	1.13693	0.0406012
ENSG00000065357	DGKA	-0.233364	0.850649	0.0406673
ENSG00000120727	PAIP2	0.257174	1.19514	0.0406873
ENSG00000166747	AP1G1	-0.29534	0.81488	0.0406873
ENSG00000117592	PRDX6	0.167742	1.1233	0.0407425
ENSG00000204387	SNHG32	0.191012	1.14156	0.0408391
ENSG00000198825	INPP5F	0.199271	1.14812	0.0409497
ENSG00000151491	EPS8	-0.176457	0.884873	0.0410018
ENSG00000173269	MMRN2	-0.306022	0.808869	0.0410018
ENSG00000023318	ERP44	0.290036	1.22267	0.0410096
ENSG00000179950	PUF60	0.15818	1.11588	0.0410096
ENSG00000136758	YME1L1	0.261115	1.1984	0.0410236
ENSG00000173530	TNFRSF10D	0.188882	1.13988	0.0411477
ENSG00000104824	HNRNPL	-0.192786	0.874915	0.0411477
ENSG00000048392	RRM2B	0.228874	1.17192	0.0413339
ENSG00000147684	NDUFB9	0.227104	1.17048	0.0413339
ENSG00000185022	MAFF	0.197587	1.14678	0.0413339
ENSG00000112246	SIM1	-1.71838	0.303889	0.0415546
ENSG00000144935	TRPC1	0.41784	1.33593	0.0416897
ENSG00000141741	MIEN1	0.184996	1.13681	0.0418617
ENSG00000101150	TPD52L2	0.12983	1.09416	0.0419193
ENSG00000196787	H2AC11	0.271121	1.20674	0.0420156
ENSG00000174516	PELI3	0.380085	1.30142	0.0420229
ENSG00000241399	CD302	0.364119	1.2871	0.0420229
ENSG00000242028	HYPK	0.353623	1.27777	0.0420229
ENSG00000135083	CCNJL	0.338326	1.26429	0.0420229
ENSG00000108679	LGALS3BP	0.283165	1.21686	0.0420229
ENSG00000122884	P4HA1	0.247455	1.18711	0.0420229
ENSG00000137288	UQCC2	0.223285	1.16739	0.0420229
ENSG00000096401	CDC5L	-0.208262	0.865579	0.0420229
ENSG00000113658	SMAD5	-0.239899	0.846805	0.0420229
ENSG00000167548	KMT2D	-0.287286	0.819442	0.0420229
ENSG00000101596	SMCHD1	-0.261715	0.834096	0.0421036
ENSG00000131018	SYNE1	-0.259693	0.835266	0.0421237
ENSG00000124172	ATP5F1E	0.294214	1.22622	0.0421254
ENSG00000101460	MAP1LC3A	0.214956	1.16067	0.0421254
ENSG00000095002	MSH2	0.211026	1.15751	0.0421254
ENSG00000095485	CWF19L1	0.191012	1.14156	0.0421254
ENSG00000111206	FOXM1	-0.220739	0.858126	0.0421254
ENSG00000005100	DHX33	-0.287946	0.819067	0.0421254
ENSG00000132436	FIGNL1	-0.338587	0.790815	0.0421254
ENSG00000138413	IDH1	0.253738	1.19229	0.0422259
ENSG00000133226	SRRM1	-0.254323	0.83838	0.0422259
ENSG00000185614	INKA1	0.444509	1.36085	0.0422306
ENSG00000025770	NCAPH2	0.120896	1.08741	0.0425097
ENSG00000078900	TP73	0.411133	1.32973	0.0427149
ENSG00000162236	STX5	0.157088	1.11503	0.0427451
ENSG00000159884	CCDC107	0.232696	1.17503	0.0428915
ENSG00000143815	LBR	-0.142308	0.906069	0.0430267
ENSG00000177105	RHOG	0.169489	1.12466	0.0430274
ENSG00000100353	EIF3D	0.137217	1.09978	0.0435653
ENSG00000214756	CSKMT	0.409875	1.32857	0.0435988
ENSG00000183978	COA3	0.184752	1.13662	0.0435988
ENSG00000071889	FAM3A	0.170629	1.12555	0.0439256
ENSG00000075213	SEMA3A	-0.497062	0.708548	0.0439256
ENSG00000136542	GALNT5	-0.501853	0.706199	0.0439256
ENSG00000151779	NBAS	0.245555	1.18555	0.0439482
ENSG00000055211	GINM1	0.216058	1.16156	0.0439482
ENSG00000140575	IQGAP1	-0.164833	0.892031	0.0439482
ENSG00000124193	SRSF6	0.175641	1.12947	0.0439978
ENSG00000128654	MTX2	0.248101	1.18764	0.0441488
ENSG00000122203	KIAA1191	0.153054	1.11192	0.0441488
ENSG00000006125	AP2B1	-0.260479	0.83481	0.0441488
ENSG00000114686	MRPL3	0.164632	1.12088	0.0441636
ENSG00000233927	RPS28	0.142119	1.10353	0.0441636
ENSG00000112992	NNT	-0.187549	0.878096	0.0441636
ENSG00000189077	TMEM120A	0.288403	1.22129	0.0442374
ENSG00000176244	ACBD7	0.300931	1.23194	0.0443799
ENSG00000143079	CTTNBP2NL	-0.221599	0.857614	0.0443799
ENSG00000042493	CAPG	0.191656	1.14207	0.0445097
ENSG00000141252	VPS53	-0.369451	0.774077	0.0445097
ENSG00000110888	CAPRIN2	-0.372689	0.772342	0.0445097
ENSG00000182362	YBEY	0.37007	1.29242	0.0445429
ENSG00000165704	HPRT1	0.242074	1.18269	0.0447033
ENSG00000100028	SNRPD3	0.182524	1.13487	0.0448502
ENSG00000109686	SH3D19	-0.24839	0.841836	0.0449532
ENSG00000055483	USP36	-0.259956	0.835113	0.0450078
ENSG00000154518	ATP5MC3	0.216367	1.1618	0.0452127
ENSG00000169291	SHE	-0.510521	0.701969	0.0453159
ENSG00000122870	BICC1	-2.02736	0.245304	0.0453159
ENSG00000173465	ZNRD2	0.254243	1.19271	0.0453497
ENSG00000095951	HIVEP1	-0.559536	0.67852	0.045487
ENSG00000180370	PAK2	-0.190409	0.876357	0.0459249
ENSG00000146648	EGFR	-0.207252	0.866185	0.046166
ENSG00000215908	CROCCP2	-0.304891	0.809503	0.046166
ENSG00000125398	SOX9	0.387099	1.30776	0.0462752
ENSG00000135404	CD63	0.173353	1.12768	0.0465026
ENSG00000198546	ZNF511	0.247156	1.18687	0.0469571
ENSG00000104299	INTS9	-0.245091	0.843763	0.0469571
ENSG00000175662	TOM1L2	-0.30277	0.810694	0.0476513
ENSG00000130332	LSM7	0.158337	1.116	0.0477491
ENSG00000115216	NRBP1	0.130442	1.09463	0.0477491
ENSG00000168734	PKIG	0.193508	1.14354	0.047789
ENSG00000213465	ARL2	0.14407	1.10502	0.047789
ENSG00000132849	PATJ	0.628133	1.54556	0.0478219
ENSG00000140992	PDPK1	-0.268834	0.82999	0.0478219
ENSG00000282885	AL627171.2	0.424067	1.3417	0.0478973
ENSG00000163041	H3-3A	0.208854	1.15577	0.0478973
ENSG00000170779	CDCA4	0.17317	1.12753	0.0478973
ENSG00000108528	SLC25A11	0.166621	1.12243	0.0478973
ENSG00000198561	CTNND1	-0.194951	0.873602	0.0478973
ENSG00000166164	BRD7	-0.233829	0.850375	0.0478973
ENSG00000048740	CELF2	-0.270675	0.828932	0.0478973
ENSG00000160049	DFFA	0.145332	1.10599	0.0479091
ENSG00000149218	ENDOD1	0.140411	1.10222	0.0479917
ENSG00000114541	FRMD4B	-0.213471	0.86246	0.0480456
ENSG00000162817	C1orf115	-0.219929	0.858607	0.0481296
ENSG00000184634	MED12	-0.315005	0.803848	0.0484078
ENSG00000136048	DRAM1	0.191358	1.14184	0.0485921
ENSG00000133069	TMCC2	0.368308	1.29084	0.0486645
ENSG00000159348	CYB5R1	0.21089	1.1574	0.0486982
ENSG00000139842	CUL4A	-0.140048	0.907489	0.0486982
ENSG00000140326	CDAN1	-0.299303	0.812645	0.0486982
ENSG00000130748	TMEM160	0.186402	1.13792	0.0490619
ENSG00000119707	RBM25	-0.226134	0.854923	0.0490619
ENSG00000119487	MAPKAP1	0.179131	1.1322	0.049165
ENSG00000163815	CLEC3B	0.380404	1.30171	0.0492848
ENSG00000102007	PLP2	0.156303	1.11443	0.0492848
ENSG00000075340	ADD2	1.28372	2.43466	0.0493119
ENSG00000167733	HSD11B1L	0.384043	1.30499	0.0494964
ENSG00000149177	PTPRJ	-0.146447	0.903473	0.0497405
ENSG00000007255	TRAPPC6A	0.355489	1.27942	0.0497831
ENSG00000011426	ANLN	-0.165843	0.891407	0.0497831
